# Supplementary material
Source: PubMed Central journal article supplement (PMC2000395)
Supplement: pnas_0609268104_2.pdf [file pnas_0609268104_2.pdf]

|                                        | SNPs position |   | Codon position |   | 10365 | 11129 | 12739 | 13728 | 15731 | 19092 | 21136 | 33945 | 48897 | 49591 | 60658 | 65132 | 65351 | 68754 | 71235 | 75351 | 77147 | 81062 | 93315 | 112520 | 113135 | 114283 | *126892 | *127143 | 127484 | 132639 | 137121 | 137976 | 139068 | 141246 | 141840 | 145913 | 146377 | 150450 | 153499 | 154419 | 157637 | 159206 | *160712 | 169859 | 178715 | 183118 |
|----------------------------------------|---------------|---|----------------|---|-------|-------|-------|-------|-------|-------|-------|-------|-------|-------|-------|-------|-------|-------|-------|-------|-------|-------|-------|--------|--------|--------|---------|---------|--------|--------|--------|--------|--------|--------|--------|--------|--------|--------|--------|--------|--------|--------|---------|--------|--------|--------|
| Clade P-II:<br>Alastrim<br>West Africa | BRZ66_gar     | C | G              | G | C     | A     | C     | C     | A     | C     | C     | C     | C     | C     | G     | C     | T     | C     | C     | C     | C     | C     | C     | C      | C      | T      | T       | G       | G      | C      | C      | G      | G      | T      | G      | A      | C      | G      | C      | G      | G      | C      | T       | A      | T      |        |
|                                        | BRZ66_39      | C | G              | G | C     | A     | C     | C     | A     | C     | C     | C     | C     | C     | G     | C     | T     | C     | C     | C     | C     | C     | C     | C      | C      | T      | T       | G       | G      | C      | C      | G      | G      | T      | G      | A      | C      | G      | C      | G      | G      | C      | T       | A      | T      |        |
|                                        | UNK52_but     | C | G              | G | C     | A     | C     | C     | A     | C     | C     | C     | C     | C     | G     | C     | T     | C     | C     | C     | C     | C     | C     | C      | C      | T      | T       | G       | G      | C      | C      | G      | G      | T      | G      | A      | C      | G      | C      | G      | G      | C      | T       | A      | T      |        |
|                                        | BEN68_59      | C | G              | G | C     | A     | C     | C     | A     | C     | C     | C     | C     | C     | G     | C     | T     | C     | C     | C     | C     | C     | C     | C      | C      | T      | T       | G       | G      | C      | C      | G      | G      | T      | G      | A      | C      | G      | C      | G      | G      | C      | T       | A      | T      |        |
|                                        | GUI69_005     | C | G              | G | C     | A     | C     | C     | A     | C     | C     | C     | C     | C     | G     | C     | T     | C     | C     | C     | C     | C     | C     | C      | C      | T      | T       | G       | G      | C      | C      | G      | G      | T      | G      | A      | C      | G      | C      | G      | G      | C      | T       | A      | T      |        |
|                                        | NIG69_001     | C | G              | G | C     | A     | C     | C     | A     | C     | C     | C     | C     | C     | G     | C     | T     | C     | C     | C     | C     | C     | C     | C      | C      | T      | T       | G       | G      | C      | C      | G      | G      | T      | G      | A      | C      | G      | C      | G      | G      | C      | T       | A      | T      |        |
| Clade P-I:<br>East Asia                | SLN68_258     | C | G              | G | C     | A     | C     | C     | A     | C     | C     | C     | C     | C     | G     | C     | T     | C     | C     | C     | C     | C     | C     | C      | T      | T      | G       | G       | C      | C      | G      | G      | T      | G      | A      | C      | G      | C      | G      | G      | C      | T      | A       | T      |        |        |
|                                        | CHN48_horn    | C | G              | G | C     | A     | C     | C     | A     | C     | C     | C     | C     | C     | G     | C     | T     | C     | C     | C     | C     | C     | C     | C      | T      | T      | G       | G       | C      | C      | G      | G      | T      | G      | A      | C      | G      | C      | G      | G      | C      | T      | A       | T      |        |        |
|                                        | JAP51_stwl    | C | G              | G | C     | A     | C     | C     | A     | C     | C     | C     | C     | C     | G     | C     | T     | C     | C     | C     | C     | C     | C     | C      | T      | T      | G       | G       | C      | C      | G      | G      | T      | G      | A      | C      | G      | C      | G      | G      | C      | T      | A       | T      |        |        |
|                                        | JAP51_hrpr    | C | G              | G | C     | A     | C     | C     | A     | C     | C     | C     | C     | C     | G     | C     | T     | C     | C     | C     | C     | C     | C     | C      | T      | T      | G       | G       | C      | C      | G      | G      | T      | G      | A      | C      | G      | C      | G      | G      | C      | T      | A       | T      |        |        |
|                                        | JAP46_yam     | C | G              | G | C     | A     | C     | C     | A     | C     | C     | C     | C     | C     | G     | C     | T     | C     | C     | C     | C     | C     | C     | C      | T      | T      | G       | G       | C      | C      | G      | G      | T      | G      | A      | C      | G      | C      | G      | G      | C      | T      | A       | T      |        |        |
|                                        | KOR47_lee     | C | G              | G | C     | A     | C     | C     | A     | C     | C     | C     | C     | C     | G     | C     | T     | C     | C     | C     | C     | C     | C     | C      | T      | T      | G       | G       | C      | C      | G      | G      | T      | G      | A      | C      | G      | C      | G      | G      | C      | T      | A       | T      |        |        |
| Clade P-I:<br>Middle East              | UNK46_harv    | C | G              | A | C     | A     | T     | C     | A     | C     | C     | C     | G     | T     | T     | T     | C     | C     | C     | C     | C     | C     | G     | C      | C      | T      | G       | G       | C      | C      | G      | A      | C      | A      | A      | A      | A      | C      | G      | A      | T      | C      | A       | C      |        |        |
|                                        | UNK46_hind    | C | G              | A | T     | A     | T     | C     | A     | C     | C     | C     | G     | T     | T     | T     | C     | C     | C     | C     | C     | C     | A     | C      | T      | T      | G       | G       | G      | T      | T      | G      | A      | C      | A      | A      | A      | A      | C      | G      | A      | T      | C       | A      | C      |        |
|                                        | IND64_vel4    | C | G              | A | T     | A     | T     | C     | A     | C     | C     | C     | G     | T     | T     | T     | C     | C     | C     | C     | C     | C     | A     | C      | T      | G      | G       | G       | G      | T      | T      | G      | A      | C      | A      | A      | A      | A      | C      | G      | A      | T      | C       | A      | C      |        |
|                                        | IND64_vel5    | C | G              | A | T     | A     | T     | C     | A     | C     | C     | C     | G     | T     | T     | T     | C     | C     | C     | C     | C     | C     | A     | C      | T      | G      | G       | G       | G      | T      | T      | G      | A      | C      | A      | A      | A      | A      | C      | G      | A      | T      | C       | A      | C      |        |
|                                        | IRN72_tbrz    | C | G              | A | T     | A     | T     | C     | A     | C     | C     | C     | G     | T     | T     | T     | C     | C     | C     | C     | C     | C     | A     | C      | T      | G      | G       | G       | G      | T      | T      | G      | A      | C      | A      | A      | A      | A      | C      | G      | A      | T      | C       | A      | C      |        |
|                                        | SYR72_119     | C | G              | A | T     | A     | T     | C     | A     | C     | C     | C     | G     | T     | T     | T     | C     | C     | C     | C     | C     | C     | A     | C      | T      | G      | G       | G       | G      | T      | T      | G      | A      | C      | A      | A      | A      | A      | C      | G      | A      | T      | C       | A      | C      |        |
| Clade P-I:<br>Southeast Asia           | AFG70_vlt4    | C | G              | A | T     | A     | T     | C     | A     | C     | C     | C     | G     | T     | T     | T     | C     | C     | C     | C     | C     | A     | C     | C      | T      | G      | G       | G       | G      | T      | T      | G      | A      | C      | A      | A      | A      | A      | C      | G      | A      | T      | C       | A      | C      |        |
|                                        | PAK69_lah     | C | G              | A | T     | A     | T     | C     | A     | C     | C     | C     | G     | T     | T     | T     | C     | C     | C     | C     | C     | C     | A     | C      | T      | G      | G       | G       | G      | T      | T      | G      | A      | C      | A      | A      | A      | A      | C      | G      | A      | T      | C       | A      | C      |        |
|                                        | KUW67_1629    | C | G              | A | T     | A     | T     | C     | A     | C     | C     | C     | G     | T     | T     | T     | C     | C     | C     | C     | C     | C     | A     | C      | T      | G      | G       | G       | G      | T      | T      | G      | A      | C      | A      | A      | A      | A      | C      | G      | A      | T      | C       | A      | C      |        |
|                                        | YUG72_164     | C | G              | A | T     | A     | T     | C     | A     | C     | C     | C     | G     | T     | T     | T     | C     | C     | C     | C     | C     | C     | A     | C      | T      | G      | G       | A       | A      | G      | T      | T      | G      | A      | C      | A      | A      | A      | A      | C      | G      | A      | T       | C      | A      | C      |
|                                        | SUM70_222     | C | G              | A | T     | A     | T     | C     | A     | C     | C     | C     | G     | T     | T     | T     | C     | C     | C     | C     | C     | C     | A     | C      | C      | T      | G       | G       | A      | A      | G      | T      | T      | G      | A      | C      | A      | A      | A      | C      | G      | A      | T       | C      | A      | C      |
|                                        | SUM70_228     | C | G              | A | T     | A     | T     | C     | A     | C     | C     | C     | G     | T     | T     | T     | C     | C     | C     | C     | C     | C     | A     | C      | C      | T      | G       | G       | A      | A      | G      | T      | T      | G      | A      | C      | A      | A      | A      | A      | C      | G      | A       | T      | C      | A      |
| Clade P-I:<br>India Continents         | IND53_mad     | C | G              | A | T     | G     | T     | C     | A     | C     | C     | C     | A     | T     | G     | T     | T     | C     | C     | C     | C     | A     | C     | C      | T      | G      | G       | A       | G      | T      | T      | G      | A      | C      | A      | A      | A      | A      | C      | G      | A      | T      | C       | A      | C      |        |
|                                        | IND67_mah     | C | G              | A | T     | G     | T     | C     | A     | C     | C     | C     | A     | T     | G     | T     | T     | C     | C     | C     | C     | C     | A     | C      | C      | T      | G       | G       | A      | G      | T      | T      | G      | A      | C      | A      | A      | A      | A      | C      | G      | A      | T       | C      | A      | C      |
|                                        | BSH75_nur     | C | G              | A | T     | G     | T     | G     | A     | C     | C     | C     | A     | T     | G     | T     | T     | C     | C     | C     | C     | C     | A     | C      | T      | T      | G       | G       | A      | G      | T      | T      | A      | A      | C      | A      | A      | A      | A      | T      | G      | A      | T       | C      | C      | C      |
|                                        | BSH75_sol     | C | G              | A | T     | G     | T     | G     | A     | C     | C     | C     | A     | T     | G     | T     | T     | T     | C     | C     | C     | C     | A     | C      | T      | T      | G       | G       | A      | G      | T      | T      | A      | A      | C      | A      | A      | A      | A      | T      | G      | A      | T       | C      | C      | C      |
|                                        | BSH75_shz     | C | G              | A | T     | G     | T     | G     | A     | C     | C     | C     | A     | T     | G     | T     | T     | T     | C     | C     | C     | C     | A     | C      | T      | T      | G       | G       | A      | G      | T      | T      | A      | A      | C      | A      | A      | A      | A      | T      | G      | A      | T       | C      | C      | C      |
|                                        | BSH75_banu    | C | G              | A | T     | G     | T     | G     | A     | C     | C     | C     | A     | T     | G     | T     | T     | T     | C     | C     | C     | C     | A     | C      | T      | T      | G       | G       | A      | G      | T      | T      | A      | A      | C      | A      | A      | A      | A      | T      | G      | A      | T       | C      | C      | C      |
|                                        | BSH75_banu2   | C | G              | A | T     | G     | T     | G     | A     | C     | C     | C     | A     | T     | G     | T     | T     | T     | C     | C     | C     | C     | A     | C      | T      | T      | G       | G       | A      | G      | T      | T      | A      | A      | C      | A      | A      | A      | A      | T      | G      | A      | T       | C      | C      | C      |
|                                        | NEP73_175     | C | G              | A | T     | G     | T     | C     | A     | C     | C     | C     | A     | T     | G     | T     | T     | T     | C     | C     | C     | C     | A     | C      | T      | T      | G       | G       | A      | G      | T      | T      | A      | A      | C      | A      | A      | A      | A      | T      | G      | A      | T       | C      | C      | C      |
|                                        | GER_hdlg      | C | G              | A | T     | G     | T     | G     | A     | C     | C     | C     | A     | T     | G     | T     | T     | T     | C     | C     | C     | C     | A     | C      | T      | T      | G       | G       | A      | G      | T      | T      | A      | A      | C      | A      | A      | A      | A      | T      | G      | A      | T       | C      | C      | C      |
|                                        | UNK47_hig     | C | G              | A | T     | G     | T     | G     | A     | C     | C     | C     | A     | T     | G     | T     | T     | T     | C     | C     | C     | C     | A     | C      | T      | T      | G       | G       | A      | G      | T      | T      | A      | A      | C      | A      | A      | A      | A      | T      | G      | A      | T       | C      | C      | C      |
| Clade P-I:<br>Non-West Africa          | SAF65_102     | T | A              | A | T     | G     | T     | G     | G     | T     | T     | T     | A     | T     | G     | T     | T     | T     | T     | T     | T     | A     | T     | T      | T      | G      | G       | A       | A      | T      | T      | A      | A      | C      | A      | G      | A      | A      | T      | T      | A      | T      | C       | C      | T      |        |
|                                        | SAF65_103     | T | A              | A | T     | G     | T     | G     | G     | T     | T     | T     | A     | T     | G     | T     | T     | T     | T     | T     | T     | T     | A     | T      | T      | T      | G       | G       | A      | A      | G      | T      | T      | A      | A      | C      | A      | G      | A      | A      | T      | T      | A       | T      | C      | T      |
|                                        | BOT72_143     | T | A              | A | T     | G     | T     | G     | G     | T     | T     | T     | A     | T     | G     | T     | T     | T     | T     | T     | T     | T     | A     | T      | T      | T      | G       | G       | A      | A      | T      | T      | A      | A      | C      | A      | G      | A      | A      | T      | T      | A      | T       | C      | C      | T      |
|                                        | BOT72_225     | T | A              | A | T     | G     | T     | G     | G     | T     | T     | T     | A     | T     | G     | T     | T     | T     | T     | T     | T     | T     | A     | T      | T      | T      | G       | G       | A      | A      | T      | T      | A      | A      | C      | A      | G      | A      | A      | T      | T      | A      | T       | C      | C      | T      |
|                                        | SUD47_rum     | T | A              | A | T     | G     | T     | G     | G     | T     | T     | T     | A     | T     | G     | T     | T     | T     | T     | T     | T     | T     | A     | T      | T      | T      | G       | G       | A      | A      | T      | T      | A      | A      | C      | A      | G      | A      | A      | T      | T      | A      | T       | C      | C      | T      |
|                                        | SUD47_jub     | T | A              | A | T     | G     | T     | G     | G     | T     | T     | T     | A     | T     | G     | T     | T     | T     | T     | T     | T     | T     | A     | T      | T      | T      | G       | G       | A      | A      | T      | T      | A      | A      | C      | A      | G      | A      | A      | T      | T      | A      | T       | C      | C      | T      |
|                                        | TAN65_kem     | T | A              | A | T     | G     | T     | G     | G     | T     | T     | T     | A     | T     | G     | T     | T     | T     | T     | T     | T     | T     | A     | T      | T      | T      | G       | G       | A      | A      | T      | T      | A      | A      | C      | A      | G      | A      | A      | T      | T      | A      | T       | C      | C      | T      |
|                                        | CNG70_46      | T | A              | A | T     | G     | T     | G     | G     | T     | T     | T     | A     | T     | G     | T     | T     | T     | T     | T     | T     | T     | A     | T      | T      | T      | G       | G       | A      | A      | T      | T      | A      | A      | C      | A      | G      | A      | A      | T      | T      | A      | T       | C      | C      | T      |
|                                        | CNG70_227     | T | A              | A | T     | G     | T     | G     | G     | T     | T     | T     | A     | T     | G     | T     | T     | T     | T     | T     | T     | T     | A     | T      | T      | T      | G       | G       | A      | A      | T      | T      | A      | A      | C      | A      | G      | A      | A      | T      | T      | A      | T       | C      | C      | T      |
|                                        | ETH72_16      | T | A              | A | T     | G     | T     | G     | G     | T     | T     | T     | A     | T     | G     | T     | T     | T     | T     | T     | T     | T     | A     | T      | T      | T      | G       | G       | A      | A      | T      | T      | A      | A      | C      | A      | G      | A      | A      | T      | T      | A      | T       | C      | C      | T      |
| ETH72_17                               | T             | A | A              | T | G     | T     | G     | G     | T     | T     | T     | A     | T     | G     | T     | T     | T     | T     | T     | T     | T     | A     | T     | T      | T      | G      | G       | A       | A      | T      | T      | A      | A      | C      | A      | G      | A      | A      | T      | T      | A      | T      | C       | C      | T      |        |
| SOM77_1605                             | T             | A | A              | T | G     | T     | G     | G     | T     | T     | T     | A     | T     | G     | T     | T     | T     | T     | T     | T     | T     | A     | T     | T      | T      | G      | G       | A       | A      | T      | T      | A      | A      | C      | A      | G      | A      | A      | T      | T      | A      | T      | C       | C      | T      |        |
| SOM77_1252                             | T             | A | A              | T | G     | T     | G     | G     | T     | T     | T     | A     | T     | G     | T     | T     | T     | T     | T     | T     | T     | A     | T     | T      | T      | G      | G       | A       | A      | T      | T      | A      | A      | C      | A      | G      | A      | A      | T      | T      | A      | T      | C       | C      | T      |        |
| SOM77_ali                              | T             | A | A              | T | G     | T     | G     | G     | T     | T     | T     | A     | T     | G     | T     | T     | T     | T     | T     | T     | T     | A     | T     | T      | T      | G      | G       | A       | A      | T      | T      | A      | A      | C      | A      | G      | A      | A      | T      | T      | A      | T      | C       | C      | T      |        |
