# Supplementary material
Source: PubMed Central journal article supplement (PMC2000395)
Supplement: pnas_0609268104_3.pdf [file pnas_0609268104_3.pdf]

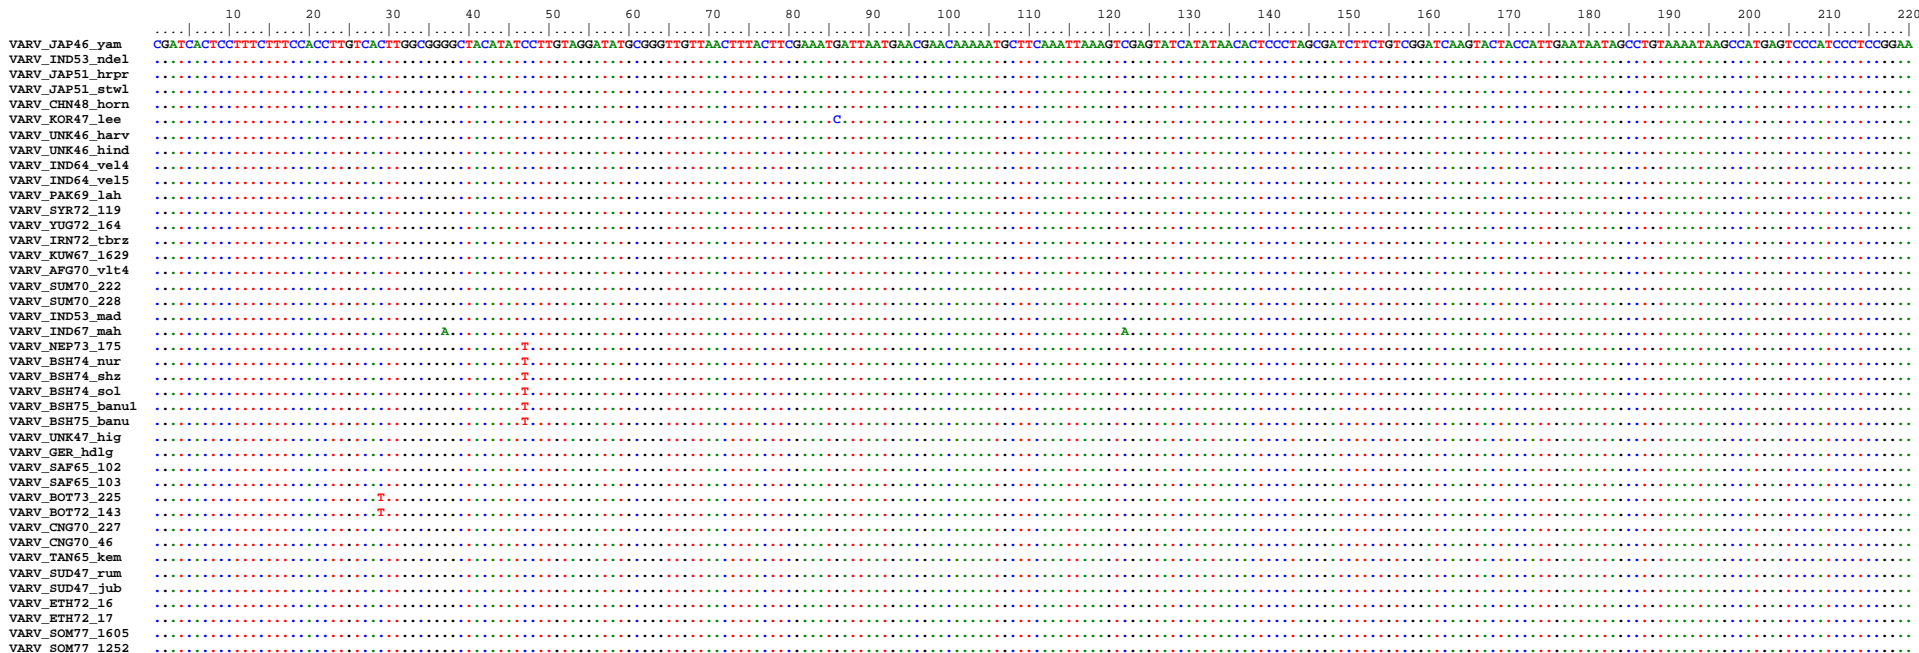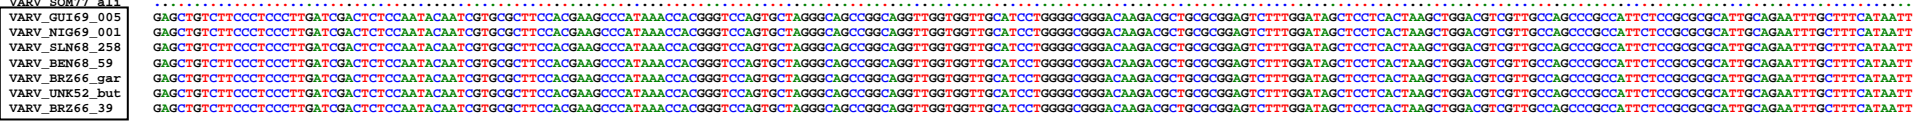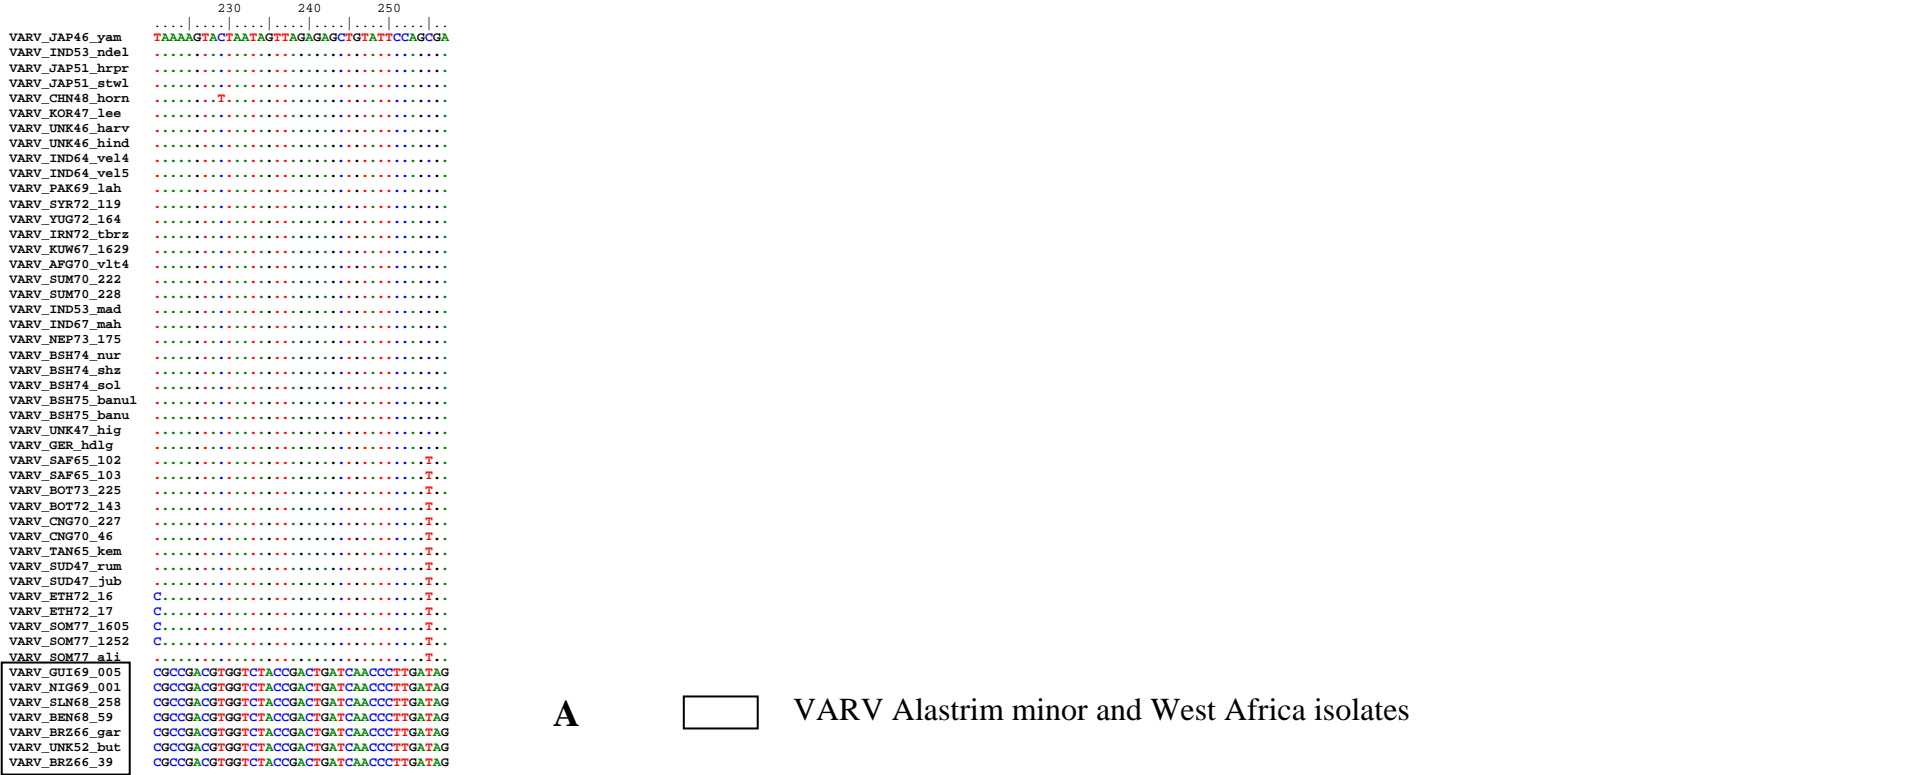

**A** VARV Alastrim minor and West Africa isolates

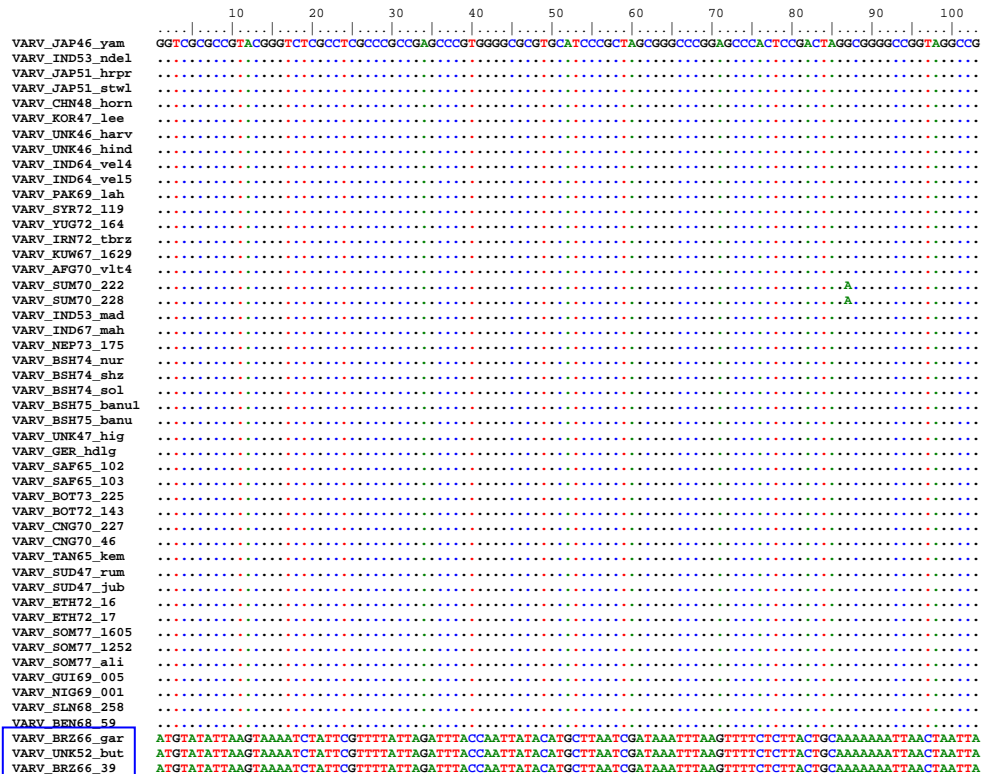

**B**

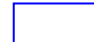

VARV Alastrim minor

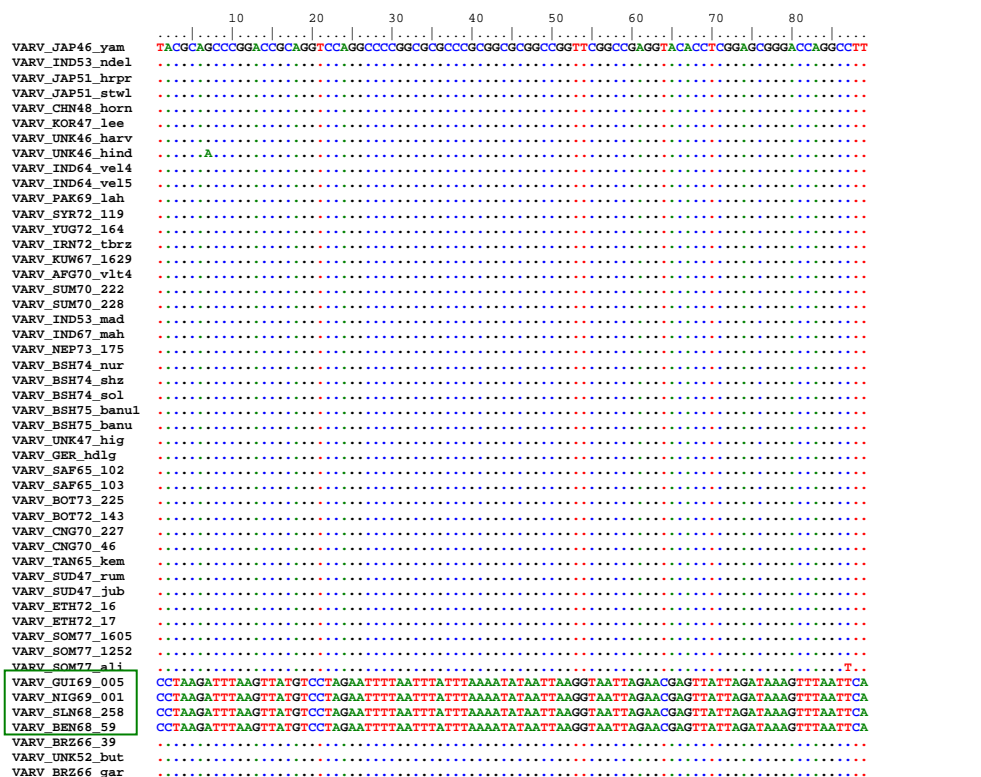

**C**

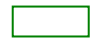

VARV West Africa clade

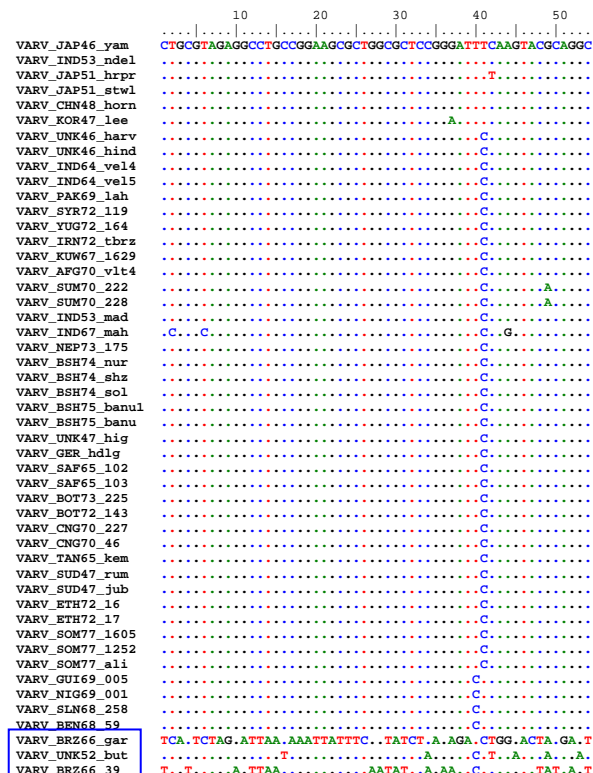

D

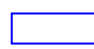

VARV Alastrim minor

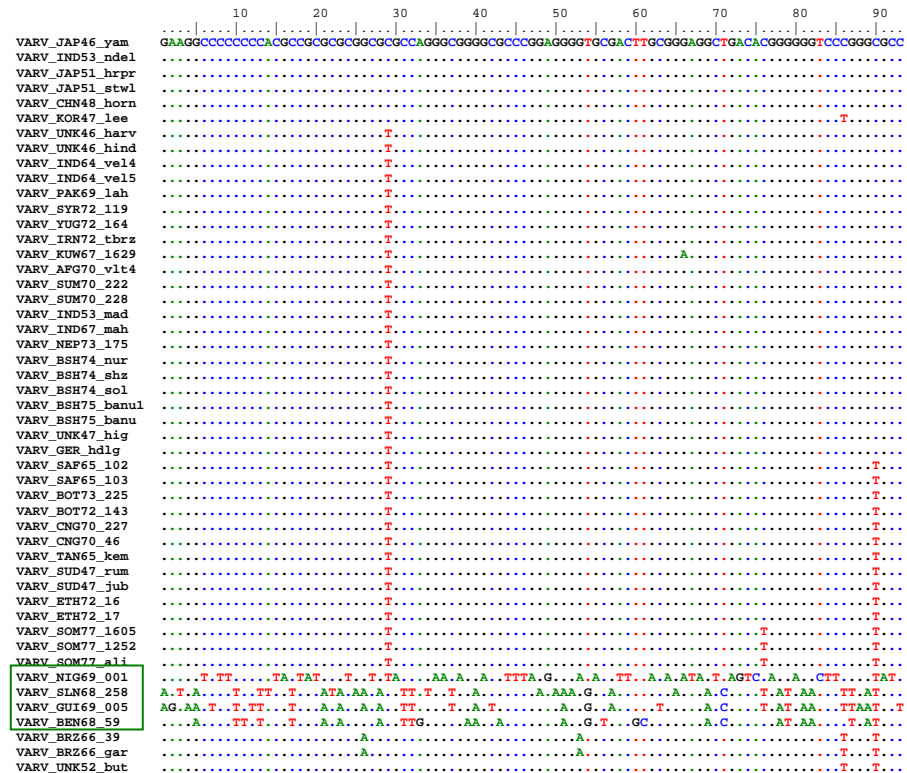

E

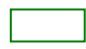

VARV West Africa
