# Supplementary material
Source: PubMed Central journal article supplement (PMC2000395)
Supplement: pnas_0609268104_4.pdf [file pnas_0609268104_4.pdf]

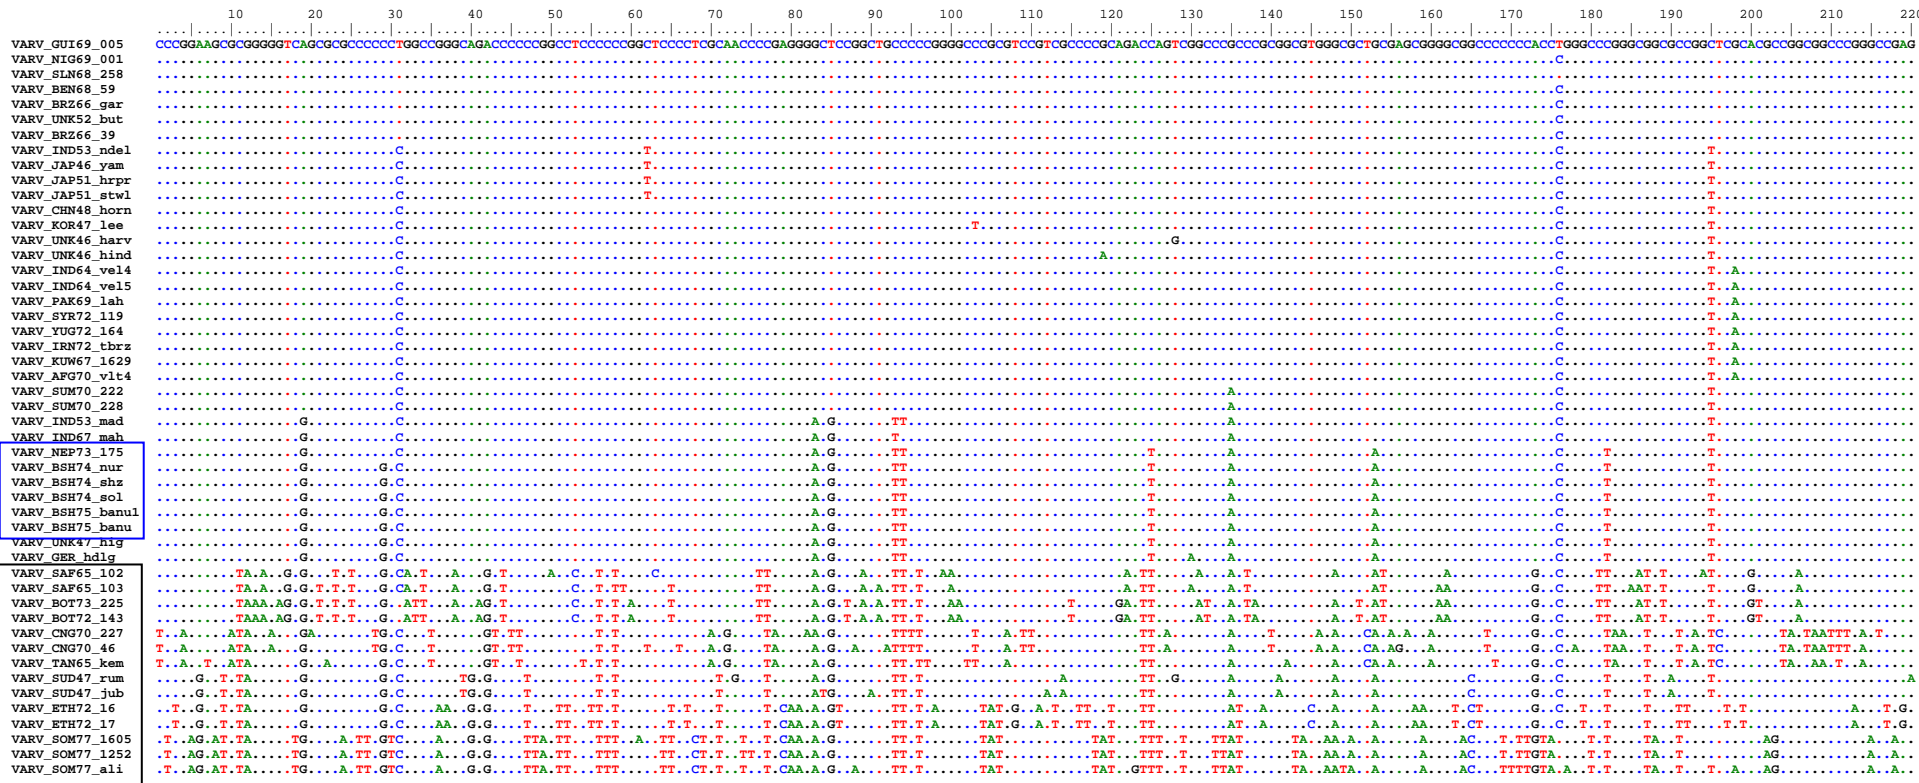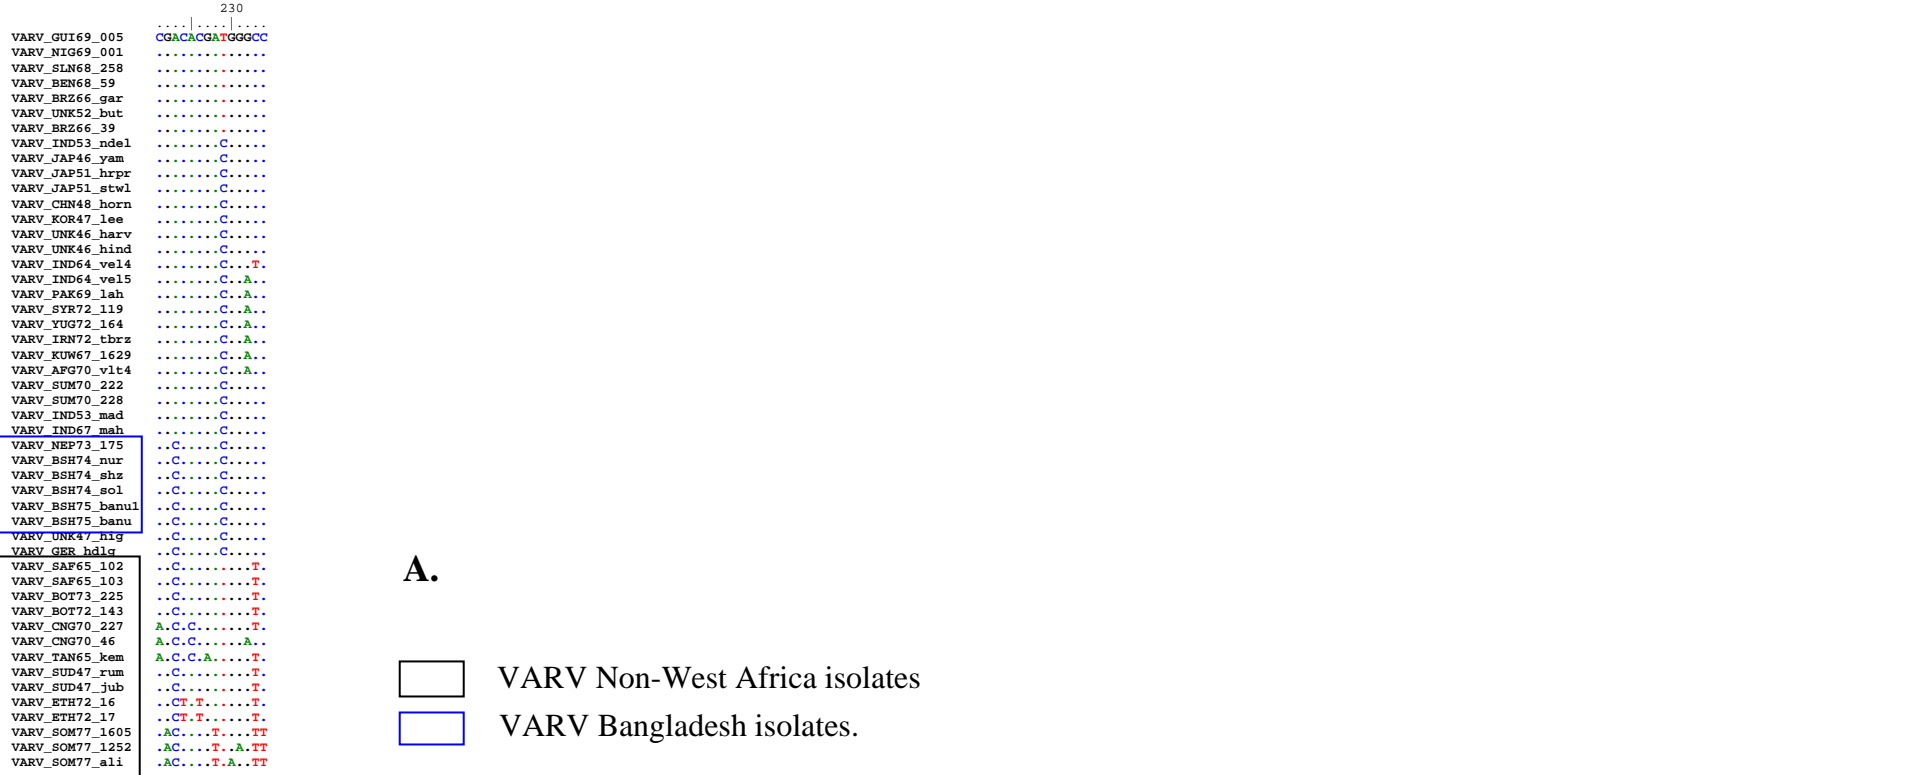

A.

VARV Non-West Africa isolates  
 VARV Bangladesh isolates.

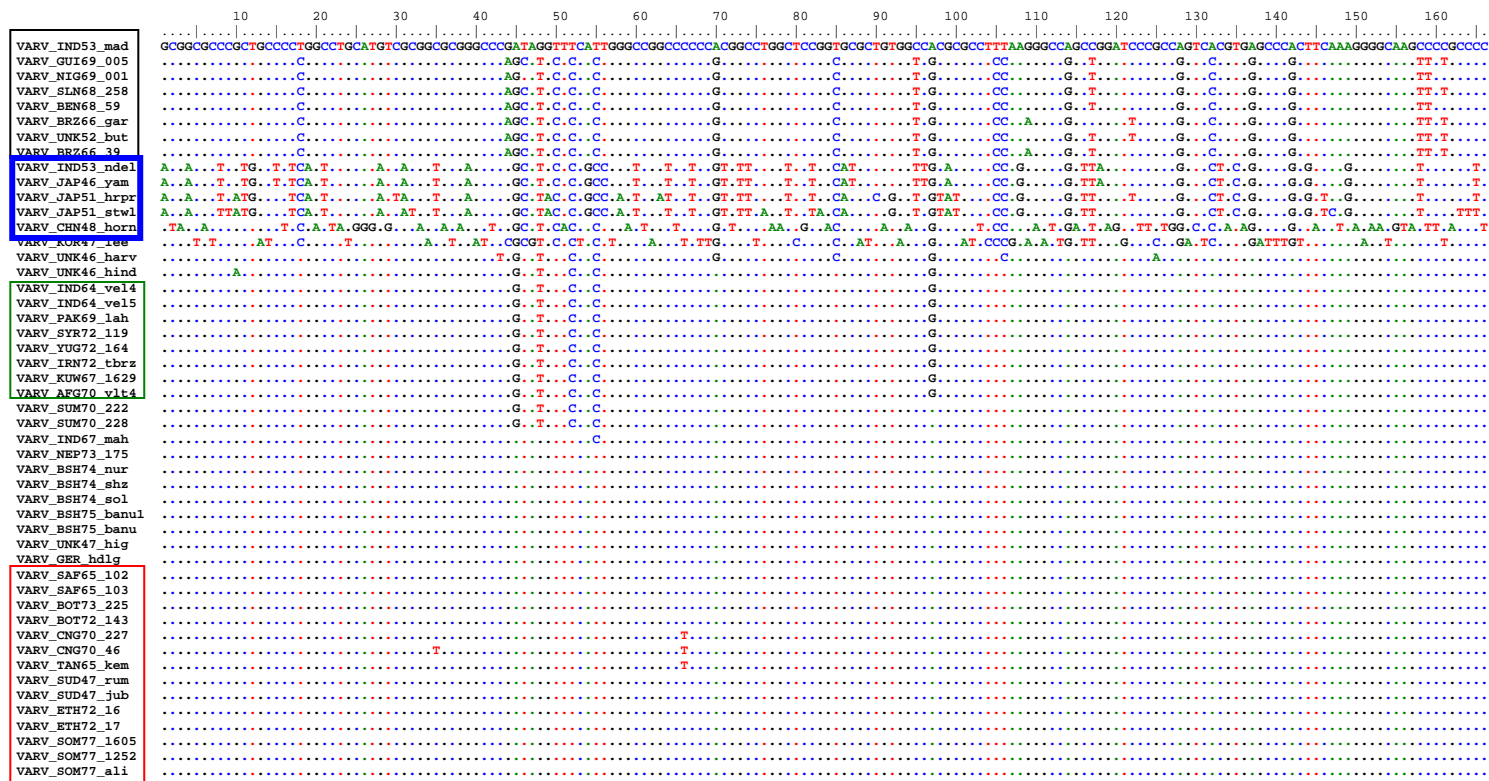

**B.**

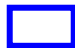

East Asia VARV isolates (P-I)

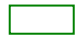

Middle East VARV isolates (P-I)

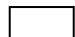

Alastrim and West Africa VARV isolates (P-II)

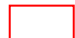

Non-West Africa VARV isolates (P-I)

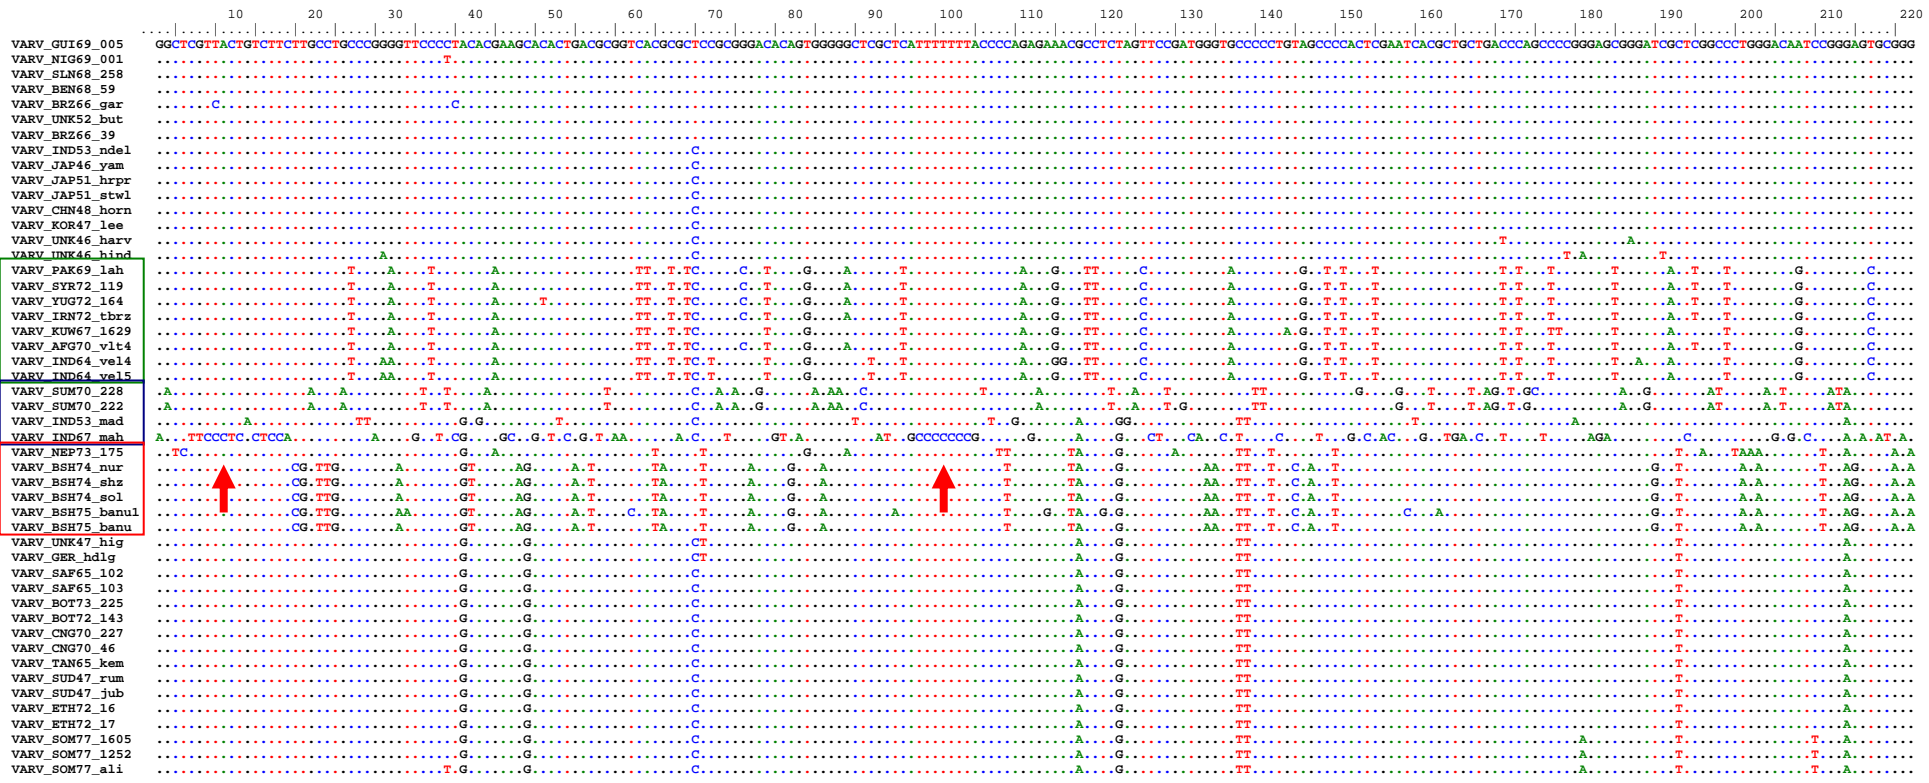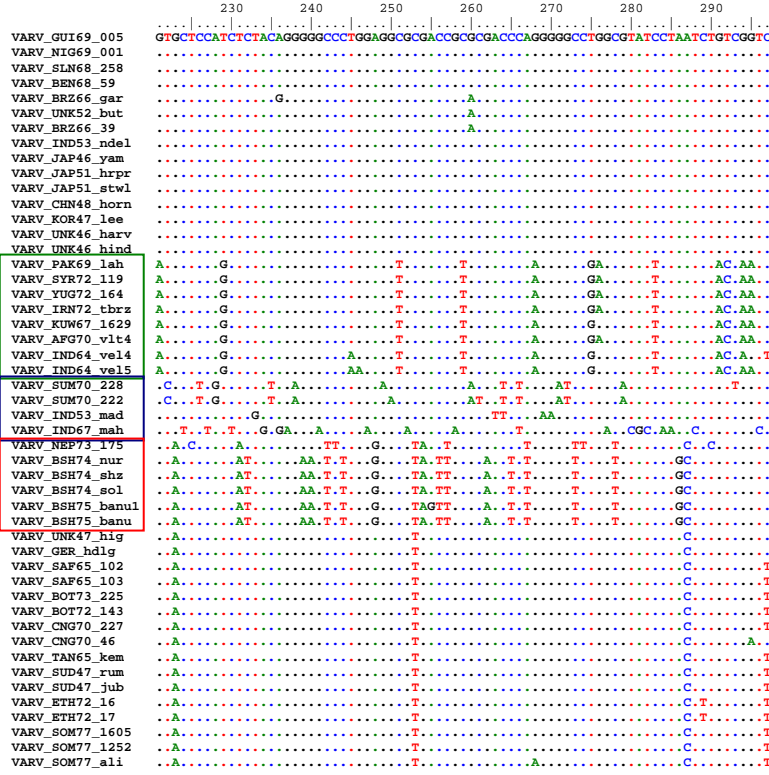

- C**
- Middle East VARV isolates
  - India and Southeast Asia VARV isolates
  - Bangladesh/Nepal/India\* VARV isolates
