# Supplementary material
Source: PubMed Central journal article supplement (PMC2000395)
Supplement: pnas_0609268104_5.pdf [file pnas_0609268104_5.pdf]

10 20 30 40 50 60 70 80 90 100 110 120 130 140 150 160 170 180

BSH75\_L225 GGCCGCGGGTTGCCGCCGTATCCGGTTGTCCAAAGCATGCGTACCTGTTCCAAAGGTCGTCCCGCTTTGTGGGCCCCCCGGGGCGTATCGGCCAGGGATGGGATCCCCTGTCCAGCCCCCTCCCCCGCTTTGGTACCGGCCACCCCCCGTGCCTTCCTCGCGAACCCGGGGAGAACA

BSH75\_banu .....T.....

BSH74\_nur .....T.....

BSH74\_shz .....T.....

BSH74\_sol .....T.....

NEP73\_175 .....T...C.....T.T.C.....CT.....G...T.....C.....A...G

UNK47\_hig .....C.....T.T.C.....CT.....G...T.....C.....T.....G...C.....G

GER\_hdlg .....C.....T.T.C.....CT.....G...T.....A.....C.....C.....G

SAF65\_102 .....C.....T.T.C.....CT.....T...G...A.T.A.....G.....T...T.....T.C.....G

SAF65\_103 .....C.....T.T.C.....CT.....T...G...A.T.A.....G.....T...T.....T.C.....G

BOT72\_143 .....C.....T.T.C.....CT.....T...G...A.T.A.....A.....G.....T...T.....T.C.....G

BOT73\_225 .....C.....T.T.C.....CT.....T...G...A.T.A.....A.....G.....T...T.....T.C.....G

SOM77\_1252 .....T...C...A.....TG.T.C.....A...CT...T...T...G...A.T.....T.....A...CT.....T...A...G

SOM77\_1605 .....T...C...A.....TG.T.C.....A...CT...T...T...G...A.T.....T.....A...CT.....T...A...G

SOM77\_ali .....T...C...A.....TG.T.C.....A...CT...T...T...G...A.T.....T.....A...CT.....T...A...G

ETH72\_16 .....T...C.....TG.T.C.....CT...T...T...G...A.T.....C.....C.....G

ETH72\_17 .....T...C.....TG.T.C.....CT...T...T...G...A.T.....C.....C.....G

SUD47\_jub .....C.....TG.T.C.....CT...T...T...G...A.T.....C.....C.....G

SUD47\_rum .....C.....TG.T.C.....CT...T...T...G...A.T.....C.....C.....G

TAN65\_kem .....T...CA.....T.T.C.....CT...A.T...G...A.T.....A.....C.....C.....G

CNG70\_46 .....T...CA.....T.T.C.....CT...A.T...G...A.T...A.....TG

CNG70\_227 .....T...CA.....T.T.C.....CT...A.T...G...A.T...A.....TG

IND67\_mah A.....T...CCAT.T.C.....CT...A...G...T...G.....T.....C.....C.....G.C.G

IND53\_mad .....C.....A.....T.T.C.....CT...TT...G...T.....C.....C.....G

SUM70\_222 .....A...C.....T.T.A.C.....CT...A...G...T...T.....T.....A.....C.....A...G

SUM70\_228 .....A...C.....T.T.A.C.....CT...A...G...T...T.....T.....A.....C.....A...G

IND64\_ve14 .....C.....A...T.T.C.....CT...T...A...A.G...T.....T.....A.....C.....A...G

IND64\_ve15 .....C.....A...T.T.C.....CT...T...A...A.G...T.....T.....A.....C.....A...G

AFG70\_vlt4 .....C.....A...T.T.C.....CT...T...A...A.G...T.....T.....A.....C.....A...G

IRN72\_tbrz .....C.....A...T.T.C.....CT...T...A...A.G...T.....T.....A.....C.....A...G

KUW67\_1629 .....C.....A...T.T.C.....CT...T...A...A.G...T.....T.....A.....C.....A...G

PAK69\_lah .....C.....A...T.T.C.....CT...T...A...A.G...T.....T.....A.....C.....A...G

SYR72\_119 .....C.....A...T.T.C.....CT...T...A...A.G...T.....T.....A.....C.....A...G

YUG72\_164 .....C.....A...T.T.C.....CT...T...A...A.G...T.....T.....A.....C.....A...G

UNK46\_harv .....A...C.....T.T.C.C.A.....CT...A...G...T...C.....A.....T.....CC.....G

UNK46\_hind .....C.....T.T.C.....CT...A...A...G...A.T.....A.....A.....T.C.....G

JAP46\_yam .....A...A...C.....T.T.C.....T.CT...G...T.T...G...G.C.....T.....C.C.....A...G

JAP51\_hrpr .....A...A...C.....T.T.C.....T.CT...G...A.T.T...G...G.C.....T.....C.C.....A...G

JAP51\_stw1 .....A...A...C.....T.T.C.....T.CT...T...G...A.T.T...G...G.C.....T.....C.C.....A...G

KOR47\_lee .....T...C.....T...T.C.....CT...G...T...G...AC.....T.....A.....C.C.....A...G

CHN48\_horn .....T.A.....C.....A.....T.T.C.....CT...G...T...G...C.....T.....C.C.....G

BEN68\_59 .....C.G...A.GC...C...T.C...G.T...C...T.T.CT.T.T...CCCTC...AT...CGCA...T.A.GC...G.TT...C.GA.A.T...TT...C.GA...AT...CA...C.CT.TAC.T...G.G

NIG69\_001 .....C.G...A.GC...C...T.C...G.T...C...T.T.CT.T.T...CCCTC...AT...CGCA...T.A.GC...G.TT...C.GA.A.T...TT...C.GA...AT...T...CA...C.CT.TAC...G.G

GUI69\_005 .....C.G...A.GC...A.C...TGC...G.T...C...T.T.CT.T.T...CCCTC...AT...A...CGCA...T.A.GC...G.TT...C.GA.ATT...TT...C.GA...AT...CA...C.CT.TAC...G.G

SLN68\_258 .....C.G...A.GC...A.C...T.C...G.T...T.C...T.T.CT.T.T...CCCTC...AT...CGCA...T.A.GC...G.TT...C.GA.A.T...TT...C.GA...AT...CA...C.CT.TAC...G.G

UNK52\_but .....A.TG...G...A.GC...C...TT...G.T...C...T.T.ACT...TT...CCCTC...T...CGC...TT...C.A.G...TT...C.TG.A...T.T.A.C.GA.A...A.G.T.A.C...C.C.AT.C...G

BRZ66\_39 .....T.A.TG...G...A.GC...C...TT...G.T...C...T.T.ACT...TT...CCCTC...T...CGC...TT...C.A.G...TT...C.TG.A...T.T.A.C.GA.A...A.G.T.A.C...C.C.AT.C...G

BRZ66\_gar .....T.A.TG...G...A.GC...C.CTT...G.T...C...T.T.ACTA...T...CCCTC...T...CGC...TT...C.ATG...TT...C.TG.A...T.T.A.CCA.AT...A.G.T.A.C...C.C.AT.C...A...G

\* \* \* \* \*













|             | 1270                         | 1280                      | 1290                    | 1300  | 1310 | 1320 | 1330 | 1340 |
|-------------|------------------------------|---------------------------|-------------------------|-------|------|------|------|------|
| BSSH75_L225 | TGGCTTGCTGCCAGGAGCTGACGCCGGA | ACTCTGACTGTGGAAGTCGTTGCCG | CCGCACCCGACCCGGCCGGCACC | GTTCC | TGCC |      |      |      |
| BSSH75_banu |                              |                           |                         |       |      |      |      |      |
| BSSH74_nur  |                              |                           |                         |       |      |      |      |      |
| BSSH74_shz  |                              |                           |                         |       |      |      |      |      |
| BSSH74_sol  |                              |                           |                         |       |      |      |      |      |
| NEP73_175   |                              |                           | A                       | C     |      |      |      |      |
| UNK47_hig   |                              |                           | A                       |       |      |      |      |      |
| GER_hdlg    | A                            |                           | A                       |       |      |      | G    |      |
| SAF65_102   |                              |                           | A                       |       |      | T    |      | T    |
| SAF65_103   |                              |                           | A                       |       |      | T    |      | T    |
| BOT72_143   |                              |                           | A                       |       |      | T    |      | T    |
| BOT73_225   |                              |                           | A                       |       |      | T    |      | T    |
| SOM77_1252  | A                            | A                         | AA                      |       |      | T    | A    | TT   |
| SOM77_1605  | A                            | A                         | AA                      |       |      | T    | A    | TT   |
| SOM77_ali   | A                            | A                         | AA                      |       |      | T    | A    | TT   |
| ETH72_16    |                              | T                         | G                       | A     | T    |      | T    | T    |
| ETH72_17    |                              | T                         | G                       | A     | T    |      | T    | T    |
| SUD47_jub   |                              |                           | A                       |       |      | T    |      | T    |
| SUD47_rum   |                              | A                         | A                       |       |      | T    |      | T    |
| TAN65_kem   |                              |                           | AA                      | C     | A    |      |      | T    |
| CNG70_46    |                              |                           | AA                      | C     |      |      |      | A    |
| CNG70_227   |                              | T                         | AA                      | C     |      |      |      | T    |
| IND67_mah   | C                            |                           | AA                      | A     | AC   |      |      | C    |
| IND53_mad   |                              |                           | A                       | A     |      |      |      |      |
| SUM70_222   |                              |                           | A                       | A     |      |      |      |      |
| SUM70_228   |                              |                           | A                       | A     |      | T    |      |      |
| IND64_ve14  | T                            |                           | A                       | A     | A    | C    | A    | T    |
| IND64_ve15  | T                            |                           | A                       | A     | A    | C    |      | A    |
| AFG70_v1t4  | T                            |                           | A                       | A     | A    | C    |      | A    |
| IRN72_tbrz  | T                            |                           | A                       | A     | A    | C    | T    | A    |
| KUW67_1629  | T                            |                           | A                       | A     | A    | C    |      | A    |
| PAK69_lah   | T                            |                           | A                       | A     | A    | C    |      | A    |
| SYR72_119   | T                            |                           | A                       | A     | A    | C    |      | A    |
| YUG72_164   | T                            |                           | A                       | A     | A    | C    |      | A    |
| UNK46_harv  |                              | A                         |                         | T     | A    | A    | T    |      |
| UNK46_hind  |                              |                           | A                       | A     | A    |      | A    | T    |
| JAP46_yam   |                              |                           | A                       | A     |      |      |      | G    |
| JAP51_hrpr  |                              |                           | A                       | A     |      | T    |      |      |
| JAP51_stw1  |                              |                           | A                       | A     |      | T    |      |      |
| KOR47_lee   |                              |                           | A                       | A     |      |      |      |      |
| CHN48_horn  |                              |                           | A                       | A     |      |      |      |      |
| BEN68_59    | C                            | TCA                       | G                       | AC    | TT   | A    | GTA  | A    |
| NIG69_001   | C                            | TC                        | G                       | AC    | TT   | A    | GTA  | A    |
| GUT69_005   | A                            | C                         | TCA                     | G     | AC   | TT   | A    | GTA  |
| SLN68_258   | C                            | TCA                       | G                       | AC    | TT   | A    | GTA  | A    |
| UNK52_but   | CC                           | C                         | G                       | AC    | T    | A    | G    | A    |
| BRZ66_39    | CC                           | C                         | G                       | AC    | T    | A    | G    | A    |
| BRZ66_gar   | CC                           | C                         | G                       | AC    | T    | A    | G    | A    |

\*

@
