# Supplementary material
Source: PubMed Central journal article supplement (PMC2000395)
Supplement: pnas_0609268104_6.pdf [file pnas_0609268104_6.pdf]

10 20 30 40 50 60 70 80 90 100 110 120 130 140 150 160 170 180

BSH75\_banu TTTCGT CAGAGCCAAGACTATGCCTACCCCGCGTTACTATCACCCAAATGCGTTTGTCTGGTATACGGTAAGATTTTG CAGTTAATGCCCTACCCATGGGGGACAATTGGGGCTGACTCGCGTTTGCCTGGCGGAAGCTTATATGAGGTATTAGCCTCTCTAGCCATTCTACGGCCCGCT

BSH74\_nur

BSH74\_sol

BSH74\_shz

NEP73\_175 .C. .CT. .G

SAF65\_103 .CT. .T.G. .A. .G

SAF65\_102 .CT. .T.G. .A. .G

BOT72\_143 .CT. .T.G. .A. .G

BOT73\_225 .CT. .T.G. .A. .G

CNG70\_227 .CT. .A.T.G. .A. .A. .A

CNG70\_46 .CT. .A.T.G. .A. .A.

TAN65\_kem .CT. .A.T.G. .A. .A.

SOM77\_1252 .T. .A. .CT. .T. .T.G. .A. .A.

SOM77\_1605 .T. .A. .CT. .T. .T.G. .A. .A.

SOM77\_ali .T. .A. .CT. .T. .T.G. .A. .A. .T.

SUD47\_jub .CT. .T. .T.G. .A. .A.

SUD47\_rum .CT. .T. .T.G. .A. .A.

ETH72\_16 .T. .CT. .T. .T.G. .A. .A.

ETH72\_17 .T. .CT. .T. .T.G. .A. .A.

UNK47\_hig .CT. .G

GER\_hdlg .CTT. .G

IND53\_mad .CT. .T.T. .G

IND67\_mah .G. .T. .T.C. .C. .C. .A. .G. .C.

SUM70\_222 .CT. .A. .TG. .T.

SUM70\_228 .CT. .A. .TG. .T.

IND64\_vel4 .G. .CT. .T. .A. .G

IND64\_vel5 .G. .CT. .T. .A. .G

IRN72\_tbrz .CT. .T. .G

YUG72\_164 .CT. .T. .G

AFG70\_vlt4 .CT. .T. .G

KUW67\_1629 .CT. .T. .G

PAK69\_lah .CT. .T. .G

SYR72\_119 .CT. .T. .G

UNK46\_harv .CT. .G

UNK46\_hind .CT. .A. .G. .A. .A

JAP46\_yam .CT. .G

JAP51\_hrpr .CT. .G. .A.

JAP51\_stw1 .CT. .T. .G. .A.

KOR47\_lee .CT. .G

CHN48\_horn .CT. .G

BEN68\_59 .G. .A. .T.C. .C.CT. .G.C. .G. .C. .T.G.A.A.

NIG69\_001 .G. .A. .T.C. .C.CT. .G.C. .G. .C. .T.GATA. .T.

SLN68\_258 .G. .A. .A. .T.C. .C.CT. .G.C. .G. .C. .T.G.A.A.

GUI69\_005 .G. .A. .A. .TGC. .C.CT. .G.C. .G. .C. .T.G.A.A.

BRZ66\_gar .G. .A. .CT. .T. .C.CT. .G.C. .T. .C. .T. .T.G.A. .T.

BRZ66\_39 .G. .A. .T. .T. .C.CT. .G.C. .T. .C. .T.G.A. .T.

UNK52\_but .G. .A. .T. .T. .C.CT. .G.C. .T. .C. .T.G.A. .T.

CML96\_m96 CCG.C.GCG.AGCAG. .C.ACGTA.T.TTCCC. G. .G. .CCA.CCCACT.AACGAT.AC GGAG.CCT.G.CGG.CA. .CG.G.GC. .T.GTGGC. . .C.GTCTAA.ACC.TA.CATTA.A.GATCCTCGC.G. .GCCGATA.AG.CG. .AG.C. .TCT. . .C

CML70\_CMS CCG.C.GCG.AGCAG. .C.ACGTA.T.TTCC. G. .G. .CCA.CCCACT.AACGAT.AC GGAG.CCT.G.CGG.CA. .CG.G.GC. .T.GTGGC. . .C.GTCTAA.ACC.TA.CATTA.A.GATCCTCGC.G. .GCCGATA.AG.CG. .AG.C. .TCT. . .C

TATV68\_dah CCG.C.G.G.T. .GT. .CT. .CG. .T. .T.C.ACG. .T. .CC.T. .AC. .A.C.ATT. .CGG.G.CCT.G.CGGGC. .T. .CG.G.GCT. .A.GTG. .CA.A. .C.G.CTA. .ACC. . .TAG. .GA.CCGCGC.GT.AGCCG.T. .G.C. .AG.C.ACT. .ATT.C

190 200 210 220 230 240 250 260 270 280 290 300 310 320 330 340 350 360  
 BSH75\_banu CGAGATGTTGGTACGGCTCGCTACCATACCCCCCGAGATCCGGCTGAAACCCCATTTTACGTTATCAAGCTGAACCCACTCCGCGGGGTGATAGCAATAGCCGACAGCGAGTCCCTCCGACTGCAGCTGCGTGTTTACCATGAATGCAGCTGACTGGTTTGAGTTAACGCACGGCGAACT  
 BSH74\_nur .....  
 BSH74\_sol .....  
 BSH74\_shz .....  
 NEP73\_175 .....  
 SAF65\_103 .....T.....T.....T.....C.....G.....C.....  
 SAF65\_102 .....T.....T.....T.....C.....G.....  
 BOT72\_143 .....T.....T.....T.....C.....G.....A.....G.....  
 BOT73\_225 .....T.....T.....T.....C.....G.....A.....G.....  
 CNG70\_227 .....T.....T.....T.....C.....G.....  
 CNG70\_46 .....T.....T.....T.....C.....G.....  
 TAN65\_kem .....T.....T.....T.....C.....G.....  
 SOM77\_1252 T.....A.....C.T.....T.....A.....G.....T.....  
 SOM77\_1605 T.....A.....C.T.....T.....A.....G.....T.....  
 SOM77\_ali T.....A.....C.T.....T.....A.....G.....T.....  
 SUD47\_jub .....T.....T.....T.....C.....G.....  
 SUD47\_rum .....T.....T.....T.....C.....G.....  
 ETH72\_16 .....T.....T.....T.....C.....G.....  
 ETH72\_17 .....T.....T.....T.....C.....G.....  
 UNK47\_hig .....T.....T.....T.....C.....G.....  
 GER\_hdlg .....T.....T.....T.....C.....G.....T.....  
 IND53\_mad .....T.....T.....T.....C.....G.....G.....  
 IND67\_mah .....C.....C.....C.....G.....C.....G.....T.....GA.....T.....A.....  
 SUM70\_222 .....T.....T.....T.....C.....G.....A.....G.....C.....G.....T.....  
 SUM70\_228 .....T.....T.....T.....C.....G.....A.....G.....C.....G.....T.....  
 IND64\_vel4 .....T.....T.....T.....C.....G.....A.....G.....C.....G.....  
 IND64\_vel5 .....T.....T.....T.....C.....G.....A.....G.....C.....G.....  
 IRN72\_tbrz .....T.....T.....T.....C.....G.....A.....G.....C.....G.....  
 YUG72\_164 .....T.....T.....T.....C.....G.....A.....G.....C.....T.....  
 AFG70\_vlt4 .....T.....T.....T.....C.....G.....A.....G.....C.....G.....  
 KUW67\_1629 .....T.....T.....T.....C.....G.....A.....G.....C.....G.....  
 PAK69\_lah .....T.....T.....T.....C.....G.....A.....G.....C.....G.....  
 SYR72\_119 .....T.....T.....T.....C.....G.....A.....G.....C.....G.....  
 UNK46\_harv .....T.....T.....T.....C.....G.....A.....G.....C.....G.....  
 UNK46\_hind .....T.....T.....T.....C.....G.....A.....G.....C.....T.....  
 JAP46\_yam .....T.....T.....T.....C.....G.....A.....G.....C.....C.....  
 JAP51\_hrpr .....T.....T.....T.....C.....G.....A.....G.....C.....C.....  
 JAP51\_stw1 .....T.....T.....T.....C.....G.....A.....G.....C.....C.....  
 KOR47\_lee .....T.....T.....T.....C.....G.....A.....G.....C.....C.....  
 CHN48\_horn .....T.....T.....T.....C.....G.....A.....G.....C.....A.....  
 BEN68\_59 .....C.....G.....T.....CA.....C.....C.T.....AC.....T.....G.....G.....C.....T.....A.....A.T.A.....C.....A.....  
 NIG69\_001 .....C.....G.....T.....T.....CA.....C.....C.T.....AC.....G.....G.....C.....A.....A.T.A.....C.....A.....  
 SLN68\_258 .....C.....G.....T.....CA.....C.....C.T.....AC.....G.....G.....C.....C.T.A.....A.T.A.....C.....A.....  
 GUI69\_005 .....C.....G.....T.....CA.....C.....C.T.....AC.....G.....G.....C.....T.....A.....A.T.A.....C.....A.....  
 BRZ66\_gar .....C.....G.....A.....A.....C.....C.....C.T.....C.....G.....C.....C.....A.....A.T.A.....C.....AC.....  
 BRZ66\_39 .....C.....G.....A.....A.....C.....C.....C.T.....C.....G.....C.....A.....A.....C.....A.....A.T.A.....C.....AC.....  
 UNK52\_but .....C.....G.....A.....A.....C.....C.....C.T.....C.....G.....C.....A.....A.....C.....A.....A.T.A.....C.....AC.....  
 CML96\_m96 .AGA.CAC.G.T.T.A..AATGG.TGCGG.A..AG.GCA.ATT..GCT..G.CCG.T.CCGCTCGAAC..AAG.C.T.T..TG.CC.A.GCGATA.G.GC..CT.CC.A..CATC..AA.C..GC..T.C.GGCA.GAC.GTCAACCCA.A.C.GTTAGT..A.GG.G  
 CML70\_CMS .AGA.CAC.G.T.T.A..AATGG.TGCGG.A..AG.GCA.ATT..GCT..G.CCG.T.CCGCTCGAAC..AAG.CTT.T..TG.CC.A.GCGATA.G.GC..CT.CC.A..CATC..AA.C..GC..T.C.GGCA.GAC.GTCAACCCA.A.C.GTTAGT..A.GG.G  
 TATV68\_dah ..GAGC..GA..G..T.CAA.GG..GCG.....G.GC.....T.C.CTT..G.CC..CTTCCG.C..G.C.....G.C..TA.....CC.T.GC.G.T..G.GC.CC.C..CCA.....C..CT.....ACT.GC..T.....GCA.G.C.GTC.ACCCA..A.CGG...G..AA.GGA.

370 380 390 400 410 420 430 440 450 460 470 480 490 500 510 520 530 540

BSH75\_banu TGACTACCATCAGCGCGCTGTGTCTAGTGTCCGATGGCGTCCGAACTATGTGAGTAGTGCAATTGACTGACGGTTCTCAAGTTAGAAACACATGTCCCTTGCCCGGATATACCAGAACGGGATACCTTCAGCGATACGACAAAACCGCTTCTCCAAATAGCGTATATTCCGACTGGCCAAAA

BSH74\_nur .....

BSH74\_sol .....

BSH74\_shz .....

NEP73\_175 .....

SAF65\_103 .....

SAF65\_102 .....

BOT72\_143 .....

BOT73\_225 .....

CNG70\_227 .....

CNG70\_46 .....

TAN65\_kem .....

SOM77\_1252 .....

SOM77\_1605 .....

SOM77\_ali .....

SUD47\_jub .....

SUD47\_rum .....

ETH72\_16 .....

ETH72\_17 .....

UNK47\_hig .....

GER\_hdlg .....

IND53\_mad .....

IND67\_mah .....

SUM70\_222 .....

SUM70\_228 .....

IND64\_vel4 .....

IND64\_vel5 .....

IRN72\_tbrz .....

YUG72\_164 .....

AFG70\_vlt4 .....

KUW67\_1629 .....

PAK69\_lah .....

SYR72\_119 .....

UNK46\_harv .....

UNK46\_hind .....

JAP46\_yam .....

JAP51\_hrpr .....

JAP51\_stw1 .....

KOR47\_lee .....

CHN48\_horn .....

BEN68\_59 .....

NIG69\_001 .....

SLN68\_258 .....

GUI69\_005 .....

BRZ66\_gar .....

BRZ66\_39 .....

UNK52\_but .....

CML96\_m96 .....

CML70\_CMS .....

TATV68\_dah .....

CAG.CG..GCTC..T.CTC.CAA.CG.GAC.T.C.A.TT..TT.GTCGC..AG.GGACTT.C.AG.C.T...C.ACAG..CC.C.G.G.GG.ATA.CC..TGA..CGCGTA..GG...AGCGT.CG.CT.AGGGTA...C.G..ATCCT...TGG.G.T...CGC...G.C..T.C.GT

CAG.CG..GCTC..T.CTC.CAA.CG.GAC.T.C.A.TT..TT.GTCGC..AG.GGACTT.C.AG.C.T...C.ACAG..CC.C.G.G.GG.ATA.CC..TGA..CGCGTA..GG...AGCGT.CG.CT.AGGGTA...C.G..ATCCT...TGG.G.T...CGC...G.C..T.C.G.

CAG.C...GC.C...TCTCAC.A.CG...C.T.C...C.T.G.CG.A.GTGGACT.GCCAG.CTG.A.CC.C.GG.CCG.GGTG.GG...TCCT.TGAA.CGCG...TGG...CGT.CG.CT.AGA.TA..G.GG..A.CC..A.TGG.GA...TCGCCA..G.C.A..CGG.

550 560 570 580 590 600 610 620 630 640 650 660 670 680 690 700 710 720  
 BSH75\_banu AACTTGCTGACGATGGGTAGATTTGACGGGGTGCCGGGTCCCTCGTTGCGCTAGCACCCCGCTAAACCTCTCGGCCCATCTCCTGCACGTGAAACAAATAATCGAGCACGTGACGACGAGGTCCATGCACCTTCGGTCCATGCGGGTGTGCATCTTTCCCTATAACATAAACCAGTGCAAA  
 BSH74\_nur .....  
 BSH74\_sol .....  
 BSH74\_shz .....  
 NEP73\_175 ..G.....A.....  
 SAF65\_103 .....C.....T.....T.T.....  
 SAF65\_102 .....A.....C.....T.....T.....C.....  
 BOT72\_143 .....C.....T.....T.....A.....  
 BOT73\_225 .....C.....T.....T.....A.....  
 CNG70\_227 .....T.....T.....T.....  
 CNG70\_46 .....T.....T.....T.....T.....  
 TAN65\_kem .....T.....T.....T.....T.....  
 SOM77\_1252 .....T.....T.....T.....T.....  
 SOM77\_1605 .....T.....T.....T.....T.....A.....  
 SOM77\_ali .....T.....T.....T.....T.....  
 SUD47\_jub .....T.....T.....T.....T.....  
 SUD47\_rum .....T.....T.....T.....T.....  
 ETH72\_16 .....T.....T.....T.....T.....  
 ETH72\_17 .....T.....T.....T.....T.....  
 UNK47\_hig .....T.....  
 GER\_hdlg .....  
 IND53\_mad .....T.....  
 IND67\_mah .....A.....GCA.....C.CCC..C.....  
 SUM70\_222 ..A.....A.....A.....C.....A.....  
 SUM70\_228 ..A.....A.....A.....C.....A.....  
 IND64\_vel4 ..G.....  
 IND64\_vel5 ..G.....A.....  
 IRN72\_tbrz ..G.....A.....  
 YUG72\_164 ..G.....A.....  
 AFG70\_vlt4 ..G.....A.....  
 KUW67\_1629 ..G.....  
 PAK69\_lah ..G.....A.....  
 SYR72\_119 ..G.....A.....  
 UNK46\_harv .....T.....  
 UNK46\_hind .....  
 JAP46\_yam .....T.....  
 JAP51\_hrpr .....T.....  
 JAP51\_stw1 .....T.....  
 KOR47\_lee .....A.....  
 CHN48\_horn .....A.....  
 BEN68\_59 ...C.....A.....A.....A.....A.....A.....C.....A.....A.....T.....G.....G.....  
 NIG69\_001 ...C.....T.....A.....T.....A.....A.....A.....A.....A.....C.....A.....A.....T.....G.....G.....  
 SLN68\_258 ...C.....A.....A.....A.....A.....A.....A.....A.....C.....A.....A.....T.....G.....G.....  
 GUI69\_005 ...C.....A.....A.....A.....A.....A.....A.....A.....C.....A.....A.....T.....G.....G.....  
 BRZ66\_gar ...T.C.....A.....T.....A.....A.....T.....A.T.....T.....G.....C.....A.....A.....A.....T.....G.....G.....  
 BRZ66\_39 ...T.C.....A.....T.....A.....A.....T.....A.T.....T.....G.....C.....A.....A.....A.....T.....G.....G.....  
 UNK52\_but ...T.C.....A.....T.....A.....A.....T.....A.T.....T.....G.....C.....A.....A.....A.....T.....G.....G.....  
 CML96\_m96 ..G..C.T.GAG.ACC..TCGTGCCCG.GATCAAC.T...C...CA.CC.T..CGAAGT.T...ACGGTT.C.CAAT..TT...CA.C.G.GA.A.GG.GGGCGGC..GATGAC.G.AG..G..G..GCC.G.C.AT.A..C...TCTGC.G.T...TA.G.GGT.CGGTTGCC..GGG  
 CML70\_CMS ..G..C.T.AG.ACC..TCGTGCCCG.GATCAAC.T...C...CA.CC.T..CGAAGT.T...ACGGTT.C.CAATA..TT...CA.C.G.GA.A.GG.GGGCGGC..GATGAC.G.AG..G..G..GCC.G.C.AT.A..C...TCTGC.G.T...TA.G.GGT.CGGTTGCC..GGG  
 TATV68\_dah GG..C...G.A.CA.TCG.GCC..GA..A.CA.T.A.CT.TC..CC.T..C.AAG.T...A.CGG..C.CAA..T.T.G..C..CTG...A.GG.G.GCGGC..G..GACTGTAG..G...GCC.G.CG..T.AA.C..T.C.GC.G...G.GG.G.GG..G.C..GGG

730 740 750 760 770 780 790 800 810 820 830 840 850 860 870 880 890 900

BSH75\_banu CGCCACCTGGCACTCGTGCTTCAAGGTCGGCGCGGTAGTGTACATCTACAGGTCGGTAGGTACTAGCATTATTGACCCCTCGGCATCGAATAATCACCTGCATCTTTTCGATGATGGAAAAATAAAGAGCGAAACATAGCCGACATTGTCTAACTTAATAGCAAATCGACAGATTACTC  
 BSH74\_nur .....  
 BSH74\_sol .....  
 BSH74\_shz .....  
 NEP73\_175 .....  
 SAF65\_103 .....T.....C.....T.....T.....C.....  
 SAF65\_102 .....C.....T.....T.....C.....  
 BOT72\_143 .....T.....C.....T.....T.....C.....  
 BOT73\_225 .....T.....C.....T.....T.....C.....  
 CNG70\_227 .....C.....T.....A.....C.....  
 CNG70\_46 .....CT.....T.....C.....  
 TAN65\_kem .....C.....T.....C.....  
 SOM77\_1252 .....T.....T.....C.....T.....A.....C.....  
 SOM77\_1605 .....T.....T.....C.....T.....A.....C.....  
 SOM77\_ali .....T.....T.....C.....T.....A.....C.....  
 SUD47\_jub .....C.....T.....T.....C.....  
 SUD47\_rum .....C.....T.....G.....T.....C.....  
 ETH72\_16 .....T.....C.....T.....T.....A.....C.....  
 ETH72\_17 .....T.....C.....T.....T.....A.....C.....  
 UNK47\_hig .....T.....C.....C.....C.....  
 GER\_hdlg .....A.....A.....C.....A.....C.....  
 IND53\_mad .....T.....C.....C.....C.....  
 IND67\_mah .....C.....G.....C.....C.....  
 SUM70\_222 .....C.....C.....C.....G.....C.....  
 SUM70\_228 .....T.....C.....C.....C.....G.....C.....  
 IND64\_vel4 .....C.....A.....A.....G.....G.....C.....G.....  
 IND64\_vel5 .....C.....A.....A.....G.....C.....C.....G.....  
 IRN72\_tbrz .....C.....A.....A.....G.....C.....C.....G.....  
 YUG72\_164 .....C.....A.....A.....G.....C.....C.....G.....  
 AFG70\_vlt4 .....C.....A.....A.....G.....C.....C.....G.....  
 KUW67\_1629 .....C.....A.....A.....G.....G.....C.....G.....  
 PAK69\_lah .....C.....A.....A.....G.....C.....C.....G.....  
 SYR72\_119 .....C.....A.....A.....G.....C.....C.....G.....  
 UNK46\_harv .....C.....T.....T.....C.....G.....  
 UNK46\_hind .....C.....C.....C.....C.....G.....  
 JAP46\_yam .....C.....A.....C.....C.....G.....T.....  
 JAP51\_hrpr .....C.....A.....C.....C.....G.....  
 JAP51\_stw1 .....C.....A.....C.....C.....G.....  
 KOR47\_lee .....T.....C.....A.....C.....C.....G.....  
 CHN48\_horn .....C.....A.....C.....C.....G.....  
 BEN68\_59 .....C.....G.....T.....A.....T.....C.....GT.....AT.....T.....A.....G.....G.....A.....C.....C.....GG.....G.....C.....  
 NIG69\_001 .....C.....G.....T.....A.....T.....C.....GT.....AT.....T.....A.....G.....G.....A.....C.....C.....GG.....G.....A.....C.....  
 SLN68\_258 .....C.....G.....T.....A.....T.....A.....C.....GT.....AT.....T.....A.....G.....G.....A.....C.....C.....GG.....G.....C.....  
 GUI69\_005 .....C.....GT.....A.....T.....C.....GT.....AT.....T.....A.....G.....G.....A.....C.....C.....GG.....G.....C.....  
 BRZ66\_gar .....T.....A.....C.....C.....G.....T.....A.....C.....GT.....AT.....T.....A.....G.....G.....A.....C.....C.....GG.....G.....C.....  
 BRZ66\_39 .....T.....A.....C.....C.....G.....T.....A.....C.....CGT.....T.....A.....G.....G.....A.....C.....C.....GG.....G.....C.....  
 UNK52\_but .....T.....A.....C.....C.....G.....T.....A.....C.....CGT.....T.....A.....G.....G.....A.....C.....C.....GG.....G.....C.....  
 CML96\_m96 T...TG...C...G...A.CCAAG.ATCTTT...AACGT.CC.TGC..G.GC.C...CG..CG..G.TGCA.CC.GTT.C.AT.TCAA.GCGGC.GA...GCTCCCC...AT.AAATGGCGGGGT.C..AG.G.GC..A..GTGCCACTCGGACCGGGGA.GGCC...G.G.CGACA  
 CML70\_CMS T...TG...C...G...A.CCAAG.ATCTTT...AACGT.CC.TGC..G.GC.C...CG..CG..G.TGCA.CC.GTT.C.AT.TCAA.GCGGC.GA...GCTCCCC...AT.AAATGGCGGGGT.C..G.G.GC..A..GTGCCACTCGGACCGGGGA.GGCC...G...CGACA  
 TATV68\_dah ...T.G.C.A.G...CA.CCAAGG..CT.T..AAACG.A.CG.G...G.G..C.T.CG..CG.GGTT.CA..C.GT...T...C.A.GCGGTG..AT.GCTCCCC..GA.....GGCGG.G.C.T.G.GTGC..A..GTGCC.C.CG..CCGG.G..GGCCT..AG...CG.C

910 920 930 940 950 960 970 980 990 1000 1010 1020 1030 1040 1050 1060 1070 1080

BSH75\_banu C T A T C G G T A G C A C T T T C G A A G G C G C A A T G G G C A A G A A C G C A A C G A T T G T T C G T A A T C G C A A T G T A A G A A T G G T C C G G C G A C C G A G A G G C A A A C C T T G C T T T A T A G C C T G G C A C A C C T G G A G C T G A G T T A T T C A C A T A A A G G T A A G T G A T G C C C A A C G C T C T A C A T C G T C C T C T C A T C

BSH74\_nur

BSH74\_sol

BSH74\_shz

NEP73\_175

SAF65\_103 . A . . . . . A . . . . . C .

SAF65\_102 . . . . . A . . . . . C .

BOT72\_143 . . . . . T . . . . . A . . . . . C .

BOT73\_225 . . . . . T . . . . . A . . . . . C .

CNG70\_227 . . . . . . . . . . A . . . . . C .

CNG70\_46 . . . . . . . . . . A . . . . . C .

TAN65\_kem

SOM77\_1252

SOM77\_1605

SOM77\_ali . A . . . . . C .

SUD47\_jub T . . . . . A . . . . . C .

SUD47\_rum

ETH72\_16 . . . . . T . . . . . C .

ETH72\_17 . . . . . T . . . . . C .

UNK47\_hig

GER\_hdlg . . . . . A . . . . . A . . . . . C .

IND53\_mad . . . . . G . . . . . C .

IND67\_mah . . . . . . . . . . T . . . . . C .

SUM70\_222 . . . . . T . . . . . T . . . . . A . . . . . G . . . . . C . . . . . C . . . . . T . . . . . T . . . . . C .

SUM70\_228 . . . . . T . . . . . T . . . . . A . . . . . C . . . . . C . . . . . T . . . . . T . . . . . C .

IND64\_vel4 . . . . . T . . . . . T . . . . . C . . . . . C . . . . . T . . . . . T . . . . . C .

IND64\_vel5 . . . . . T . . . . . T . . . . . C . . . . . C . . . . . C . . . . . C . . . . . C .

IRN72\_tbrz . . . . . T . . . . . T . . . . . C . . . . . C . . . . . C . . . . . C . . . . . C .

YUG72\_164 . . . . . T . . . . . T . . . . . C . . . . . C . . . . . C . . . . . C . . . . . C .

AFG70\_vlt4 . . . . . T . . . . . T . . . . . C . . . . . C . . . . . C . . . . . C . . . . . C .

KUW67\_1629 . . . . . T . . . . . T . . . . . C . . . . . C . . . . . C . . . . . C . . . . . C .

PAK69\_lah . . . . . T . . . . . T . . . . . C . . . . . C . . . . . C . . . . . C . . . . . C .

SYR72\_119 . . . . . T . . . . . T . . . . . C . . . . . C . . . . . C . . . . . C . . . . . C .

UNK46\_harv . . . . . T . . . . . T . . . . . C . . . . . C . . . . . T . . . . . C .

UNK46\_hind . . . . . T . . . . . T . . . . . C . . . . . C . . . . . C . . . . . C .

JAP46\_yam . . . . . T . . . . . T . . . . . C . . . . . C . . . . . G . . . . . C .

JAP51\_hrpr . . . . . T . . . . . T . . . . . C . . . . . C . . . . . G . . . . . C .

JAP51\_stw1 . . . . . T . . . . . T . . . . . C . . . . . C . . . . . G . . . . . C .

KOR47\_lee . . . . . G . T . . . . . C . . . . . C . . . . . C . . . . . C . . . . . C .

CHN48\_horn . . . . . T . . . . . T . . . . . C . . . . . A . . . . . C . . . . . C . . . . . C .

BEN68\_59 . . . . . T . . . . . T . . . . . A . G . . G . T . . . . . T T . G G C . . G . . . . . G . T . . G . C . . . . . T . . . . . T . . . . . C . . . . . A C . . . . . G . . . . . C . T . T .

NIG69\_001 . . . . . T . . . . . T . . . . . A . G . . G . T . . . . . T T . G G C . . G . . . . . G . T . . G . C . . . . . T . . . . . T . . . . . C . . . . . A C . . . . . C . T . T .

SLN68\_258 . . . . . T . . . . . T . . . . . A . G . . G . T . . . . . T T . G G C . . G . . . . . G . T . . G . C . . . . . T . . . . . T . . . . . C . . . . . A C . . . . . C . T . T .

GUI69\_005 . . . . . T . . . . . T . . . . . A . G . . G . T . . . . . T T . G G C . . G . . . . . G . T . . G . C . . . . . T . . . . . T . . . . . C . . . . . A C . . . . . C . T . T .

BRZ66\_gar . . . . . A . . . . . A T . . . . . A . G . . G . . . . . T . . . . . T T . G G C . . G . . . . . G . T . . G . C . T . . . . . T . . . . . T . . . . . C . . . . . C . . . . . C . T .

BRZ66\_39 . . . . . A . . . . . T . . . . . A . G . . G . . . . . T . . . . . T T . G G C . . G . . . . . G . T . . G . C . T . . . . . T . . . . . T . . . . . C . . . . . C . . . . . C . T .

UNK52\_but . . . . . A . . . . . T . . . . . A . G . . G . . . . . T . . . . . T T . G G C . . G . . . . . G . T . . G . C . T . . . . . T . . . . . T . . . . . C . . . . . C . . . . . C . T .

CML96\_m96 . C G G . . C G . T G . C A A . A G . T A A T G G C A A . . G G A G G T A . G G T . C C T A G . . G G . T . G G C T C G C . G . A . A A . T . A A T G T C A A . G G G . A A C . T . C C G G C C . T T C . A . G A T . . A A A G . C . G C C A G C C . G . G C G G . . C G G . . G C A A . . G . T A T C A C G . C A A C . T C . C T G C T

CML70\_CMS . C G G . . C G . T G . C A A . A G . T A A T G G C A A . . G G A G G T A . G G T . C C T . G . . G G . T . G G C T C G C . G . A . A A . T . A A T G T C A A . G G G . A A C . T . C C G G C C . T T C . A . G A T . . A A A G . C . G C C A G C C . G . G C G G . . C G G . . G C A A . . G . T A T C A C G . C A A C . T C . C T G C T

TATV68\_dah . C . G . T . C . G . . G . C C C . . T . . . G C . . . T . G G . G G . . G . . . C . T . G . A G G C . T . G G C . C . C . G G . . . A . C A T . . . T G A C . . T . G G T A . C . . C C . G C C A . . C . . G . T . . A G T . C . G . C A . C C A G A G C G G . . A C G G . . T G C A . . G . . T C . G C . T C . . C T T C . C . G C .

1090 1100 1110 1120 1130 1140 1150 1160 1170 1180 1190 1200 1210 1220 1230 1240 1250 1260

BSH75\_banu CCGGGCTTATACAACGCTTAGGAGGAGTCTCTATTTAGCACGCTTGGAGTCTTTCACATTAAGAGCCTAAAGTCCCGGAGTAGACCGGTCTACGAGCCTATAACCATGAGAAAATCTCTGTCACCCATGAAATGCACCGACTATGACGGGAACAATATACAAACCTCCGCGACTCACT  
 BSH74\_nur .....  
 BSH74\_sol .....  
 BSH74\_shz .....  
 NEP73\_175 .....  
 SAF65\_103 .....  
 SAF65\_102 .....  
 BOT72\_143 .....  
 BOT73\_225 .....  
 CNG70\_227 .....  
 CNG70\_46 .....  
 TAN65\_kem .....  
 SOM77\_1252 .....  
 SOM77\_1605 .....  
 SOM77\_ali .....  
 SUD47\_jub .....  
 SUD47\_rum .....  
 ETH72\_16 .....  
 ETH72\_17 .....  
 UNK47\_hig .....  
 GER\_hdlg .....  
 IND53\_mad .....  
 IND67\_mah .....  
 SUM70\_222 .....  
 SUM70\_228 .....  
 IND64\_vel4 .....  
 IND64\_vel5 .....  
 IRN72\_tbrz .....  
 YUG72\_164 .....  
 AFG70\_vlt4 .....  
 KUW67\_1629 .....  
 PAK69\_lah .....  
 SYR72\_119 .....  
 UNK46\_harv .....  
 UNK46\_hind .....  
 JAP46\_yam .....  
 JAP51\_hrpr .....  
 JAP51\_stwl .....  
 KOR47\_lee .....  
 CHN48\_horn .....  
 BEN68\_59 .....  
 NIG69\_001 .....  
 SLN68\_258 .....  
 GUI69\_005 .....  
 BRZ66\_gar .....  
 BRZ66\_39 .....  
 UNK52\_but .....  
 CML96\_m96 .....  
 CML70\_CMS .....  
 TATV68\_dah .....

1270 1280 1290 1300 1310 1320 1330 1340 1350 1360 1370 1380 1390 1400 1410 1420 1430 1440  
 BSH75\_banu TATGACTTGAGGGGTGGACCCGCGATAGGTGTTAGTTGGTCATGGTAGCGTGTTCCTTACGAACTAATATGCCGCGCCTTGGGGTCATATGTAATCCATCGCTGGGCGATCACCTGGACTTCATCGACTCAATCATGTCCTCGCTTTCTATACGTTGCCTACACTCACTTAATGTGCAATA  
 BSH74\_nur .....  
 BSH74\_sol .....  
 BSH74\_shz .....  
 NEP73\_175 .....  
 SAF65\_103 .....  
 SAF65\_102 .....  
 BOT72\_143 .....  
 BOT73\_225 .....  
 CNG70\_227 .....  
 CNG70\_46 .....  
 TAN65\_kem .....  
 SOM77\_1252 .....  
 SOM77\_1605 .....  
 SOM77\_ali .....  
 SUD47\_jub .....  
 SUD47\_rum .....  
 ETH72\_16 .....  
 ETH72\_17 .....  
 UNK47\_hig .....  
 GER\_hdlg .....  
 IND53\_mad .....  
 IND67\_mah .....  
 SUM70\_222 .....  
 SUM70\_228 .....  
 IND64\_vel4 .....  
 IND64\_vel5 .....  
 IRN72\_tbrz .....  
 YUG72\_164 .....  
 AFG70\_vlt4 .....  
 KUW67\_1629 .....  
 PAK69\_lah .....  
 SYR72\_119 .....  
 UNK46\_harv .....  
 UNK46\_hind .....  
 JAP46\_yam .....  
 JAP51\_hrpr .....  
 JAP51\_stw1 .....  
 KOR47\_lee .....  
 CHN48\_horn .....  
 BEN68\_59 .....  
 NIG69\_001 .....  
 SLN68\_258 .....  
 GUI69\_005 .....  
 BRZ66\_gar .....  
 BRZ66\_39 .....  
 UNK52\_but .....  
 CML96\_m96 .....  
 CML70\_CMS .....  
 TATV68\_dah .....



1450 1460 1470 1480 1490 1500 1510 1520 1530 1540 1550 1560 1570 1580 1590 1600 1610 1620

BSH75\_banu GGCATCTCCGACGTAGGCACGTGTCACCCGCCCATGGGCTGTGCTTTTCTGTTTCTGCCACGTTTCAGTGAACGAGCATTCCGCCCCGCCACGGGGCTGGGTGAAGTTCCTGAGCGGTAAAGCGTCTTAGAACCGGACCTCGATCGTATCCAACGCCAAGGAACGTGTTTCATCGTGTAA  
BSH74\_nur .....  
BSH74\_sol .....  
BSH74\_shz .....  
NEP73\_175 .....  
SAF65\_103 .....T  
SAF65\_102 .....A...T  
BOT72\_143 .....T...A...T  
BOT73\_225 .....T...A...T  
CNG70\_227 .....T...A...T  
CNG70\_46 .....T...A...T  
TAN65\_kem .....T...T  
SOM77\_1252 .....T...T  
SOM77\_1605 .....T...T...T  
SOM77\_ali .....T...T...T  
SUD47\_jub .....T...T...T  
SUD47\_rum .....T...T...G...T  
ETH72\_16 .....T...T...T  
ETH72\_17 .....T...T...T  
UNK47\_hig .....T...T...T  
GER\_hdlg .....T...C...T...C  
IND53\_mad .....T...T...T  
IND67\_mah .....A...T...T  
SUM70\_222 .....T...T...T  
SUM70\_228 .....T...T...T  
IND64\_vel4 .....T...A...T  
IND64\_vel5 .....T...A...T  
IRN72\_tbrz .....T...A...T  
YUG72\_164 .....T...A...T  
AFG70\_vlt4 .....T...A...T  
KUW67\_1629 .....T...A...T  
PAK69\_lah .....T...A...T  
SYR72\_119 .....T...A...T  
UNK46\_harv .....A...T...C...G...T  
UNK46\_hind .....T...T...C...G...T  
JAP46\_yam .....T...T...C...A...T  
JAP51\_hrpr .....T...T...C...A...T  
JAP51\_stw1 .....T...A...C...A...T  
KOR47\_lee .....T...T...C...A...TT  
CHN48\_horn .....T...A...C...T  
BEN68\_59 A...T...A...C...C...C...T...C...T...TA...T...C...T...A...A...AA...G...C...C...T...T...G...T...A...G...T...C...  
NIG69\_001 A...T...T...A...T...C...C...A...C...T...C...T...TA...T...C...T...G...A...A...AA...G...C...C...T...T...T...G...T...A...G...T...C...  
SLN68\_258 A...T...A...C...C...C...C...T...C...T...TA...T...C...TA...A...A...AA...G...C...C...T...T...T...G...A...T...G...T...C...  
GUI69\_005 A...T...A...C...C...C...C...T...C...T...TA...T...C...T...A...A...AA...G...C...C...T...T...T...G...T...A...G...T...C...  
BRZ66\_gar A...T...A...C...C...A...C...C...T...C...T...C...T...AA...A...A...G...C...TC...A...T...G...T...T...A...G...T...C...  
BRZ66\_39 A...T...A...A...C...A...C...C...T...C...T...A...C...T...AA...A...A...G...C...TC...A...T...G...T...T...A...G...T...C...  
UNK52\_but A...T...A...C...C...A...C...C...C...T...C...T...C...T...AA...A...A...G...C...C...C...A...T...G...T...T...A...G...T...C...  
CML96\_m96 ..TTCTC...GTACG.T.GT.CG..G..AT.ATTG.T.TCAC..CCCC.G.CCCCTC.TTGT..CC.GTCAGG..G..GCCT..AG...TA..C..AC.GGA.CTT.CACT.AAC.GA..C.CCCA.G.TT.GTTC..GCT..GC.AGG.ATTG.TG.TCTC.GGC.A.ACC.C  
CML70\_CMS ..TTCTC...GT.CG.T.GT.CG..G..AT.ATTG.T.TCAC..CCCC.G.CCCCTC.TTGT..CC.GTCAGG..G..GCCT..AG...TA..C..AC.GGA.CTT.CACT.AAC.GA..C.CCCA.G.TT.GTTC..GCT..GC.AGG.ATTG.TG.TCTC.GGC.A.ACC.C  
TATV68\_dah ..TCTC.T.G..CG..TG..C..T...TT...AT.TCAC.TCCCCTG.CCCC.CA.TGT.CCCTGTC.GG..G..GCCT...GT.TG...TCA.A..GG..CTT.C...AAC.G...C.C.C.GG.T..GT.C..GCT...C..GG..TG..G..C.CG.G..AG.CCT.

1630 1640 1650 1660 1670 1680 1690 1700 1710 1720 1730 1740 1750 1760 1770 1780 1790 1800

BSH75\_banu GTGAAATGGATGACGGTCTCCACCTAACAAATTAACAACGTTGGTCTATCCCAATCGGAGAGACTGTAATATTAGACTTGCAGTCCGGTCCGTTTTTGGCTTTGAGCTGTGCGCGTGCAGGGTGCAAGCAGAAGAGAGTGCCGGTAGAACCTCTGGTTCTTTAGAAAGAGCATTCCGAAACGAGCG  
 BSH74\_nur .....  
 BSH74\_sol .....  
 BSH74\_shz .....  
 NEP73\_175 .....  
 SAF65\_103 ..T...A.....  
 SAF65\_102 .....  
 BOT72\_143 .....  
 BOT73\_225 .....  
 CNG70\_227 .....  
 CNG70\_46 .....  
 TAN65\_kem .....  
 SOM77\_1252 .....  
 SOM77\_1605 .....  
 SOM77\_ali .....  
 SUD47\_jub .....  
 SUD47\_rum .....  
 ETH72\_16 .....  
 ETH72\_17 .....  
 UNK47\_hig .....  
 GER\_hdlg ..T...A.....  
 IND53\_mad .....  
 IND67\_mah .....G.....G.....  
 SUM70\_222 .....A.....  
 SUM70\_228 .....A.....  
 IND64\_vel4 .....G.....  
 IND64\_vel5 .....G.....  
 IRN72\_tbrz .....G.....  
 YUG72\_164 .....G.....  
 AFG70\_vlt4 .....G.....  
 KUW67\_1629 .....G.....  
 PAK69\_lah .....G.....  
 SYR72\_119 .....G.....  
 UNK46\_harv .....A.....  
 UNK46\_hind .....A.....  
 JAP46\_yam .....C.....  
 JAP51\_hrpr .....G.....  
 JAP51\_stw1 .....G.....  
 KOR47\_lee .....A.....  
 CHN48\_horn .....A.....  
 BEN68\_59 .....G...G...T.T...G...C...G...C...A.G.C..A.T.C...CAG.G..T.....G.....  
 NIG69\_001 .....G...G...T.T...G...C...G...C...A.G.C..A.T.C...A.CAG.G..T.....G.....  
 SLN68\_258 .....G...G...T.T...G...C...G...C...A.G.C..A.T.C...CAG.G..T.....G.....  
 GUI69\_005 .....G...G...T.T...G...C...G...C...A.G.C..A.T.C...CAG.G..T.....G.....  
 BRZ66\_gar .....G...T.T...G...T.C.A...G...C...TG.C..A.TTA.C...CA.....T.....  
 BRZ66\_39 .....G...T.T...G...T.C.A...G...C...TG.C..A.TTA.C...CA.....A.....  
 UNK52\_but .....G...T.T...G...T.C...G...C...TG.C..A.TA.C...CA.....A.....  
 CML96\_m96 ACAGGGC..G...TCA.TA.AG.TCGG.GG.CGCCG..C..C.CG.ATG.CAA.TG.G..ACGGC.C.G..ACC...CGA..C...CCCCA.AACA.GTT..AA...TCA.GTAAC..GG..GAGGATAC.A.A...GGTGG.C.CAA.CTCCCG.GG.G.TG.CT..GGG.AGTA  
 CML70\_CMS ACAGGGC..G...TCA.TA.AG.TCGG.GG.CGCCG..C..C.CG.ATG.CAAA.TG.G..ACGGC.C.G..CC...CGA..C...CCCCA.AACA.GTT..AA...TCA.GTAAC..GG..GAGGATAC.A.A...GGTGG.CACAA.CTCCCG.GG.G.TG.CT..GGG.AGTA  
 TATV68\_dah ACAGGGC.AG.AG..AC.A..G...GGTGG.CGC.G.AC..CTCGCA.G.C.A.CTG.GACACGGC.C.G.A..CC...TC..T...CC.CCA..CA.GT..AAA...C...C.GG.TGAGGAT.CA.T.T..GG.GG.C.C...C.CCAG...A...G.CTAT..G.GT

1810 1820 1830 1840 1850 1860 1870 1880 1890 1900 1910 1920 1930 1940 1950 1960 1970 1980

BSH75\_banu GTCCTCCGAGATAGAGATTGTAACGTCCTGAAGCGAAGTACCGATAAGAGTCGTTAACTTTCCACACCGCTTGGATTGAATTGAAGACTAAGGTGACGCTGCGGGTCTAAGGATAGTGGCCCGAAGCGCCATTACCGGCGCCTATCCCCGGCCGTACGGGGGTAGGGCGAAATGACGC

BSH74\_nur

BSH74\_sol

BSH74\_shz

NEP73\_175

SAF65\_103 G

SAF65\_102 A G

BOT72\_143 A G

BOT73\_225 A G

CNG70\_227 A G

CNG70\_46 A G

TAN65\_kem A G

SOM77\_1252 A G

SOM77\_1605 A G

SOM77\_al1 A.T G

SUD47\_jub A G

SUD47\_rum A G

ETH72\_16 A G

ETH72\_17 A G

UNK47\_hig A G

GER\_hdlg G

IND53\_mad G

IND67\_mah G

SUM70\_222 G

SUM70\_228 G

IND64\_ve14 G

IND64\_ve15 G

IRN72\_tbrz G

YUG72\_164 G

AFG70\_vlt4 G

KUW67\_1629 G

PAK69\_lah G

SYR72\_119 G

UNK46\_harv G

UNK46\_hind G

JAP46\_yam G

JAP51\_hrpr G

JAP51\_stw1 G

KOR47\_lee G

CHN48\_horn G

BEN68\_59 G

NIG69\_001 G

SLN68\_258 G

GUI69\_005 G

BRZ66\_gar G

BRZ66\_39 G

UNK52\_but G

CML96\_m96 .C.CCT.AG.GCG.G.G.CACGGT.CT.CAT.TT.GGTCGTA.G.GGAGTCA.CCGG.CC.G.A.TA.A.GCCA.GCCACGAG.CGGC.C.GT.TCCT.C.CG.GCG.C.TTT.CG.T.T.CC.T.TACTACG.T.TT.TA.A.AATTAA.TG.G.CGT.T

CML70\_CMS .C.CCT.AG.GCG.G.G.CACGGT.CT.CAT.TT.GGTCGTA.G.GGAGTCA.CCGG.CC.G.A.TAC.A.GCCA.GCCACGAG.CGGC.C.GT.TCCT.C.CG.GCG.C.TTT.CG.T.T.CC.T.TACTACG.T.TT.TA.A.AATTAA.TG.G.CGT.T

TATV68\_dah .C.CCTT.C.GCGTG.G.C.GGTAC.C.TG.GG.CG.G.GG.GTC.CCGGTCC.GT.A.GA.GCCA.GCC.G.G.C.G.G.C.T.T.CTGG.G.G.C.T.CG.T.T.CCG.A.A.AC.AT.T.A.A.AAAT.T.GTG.GT.T

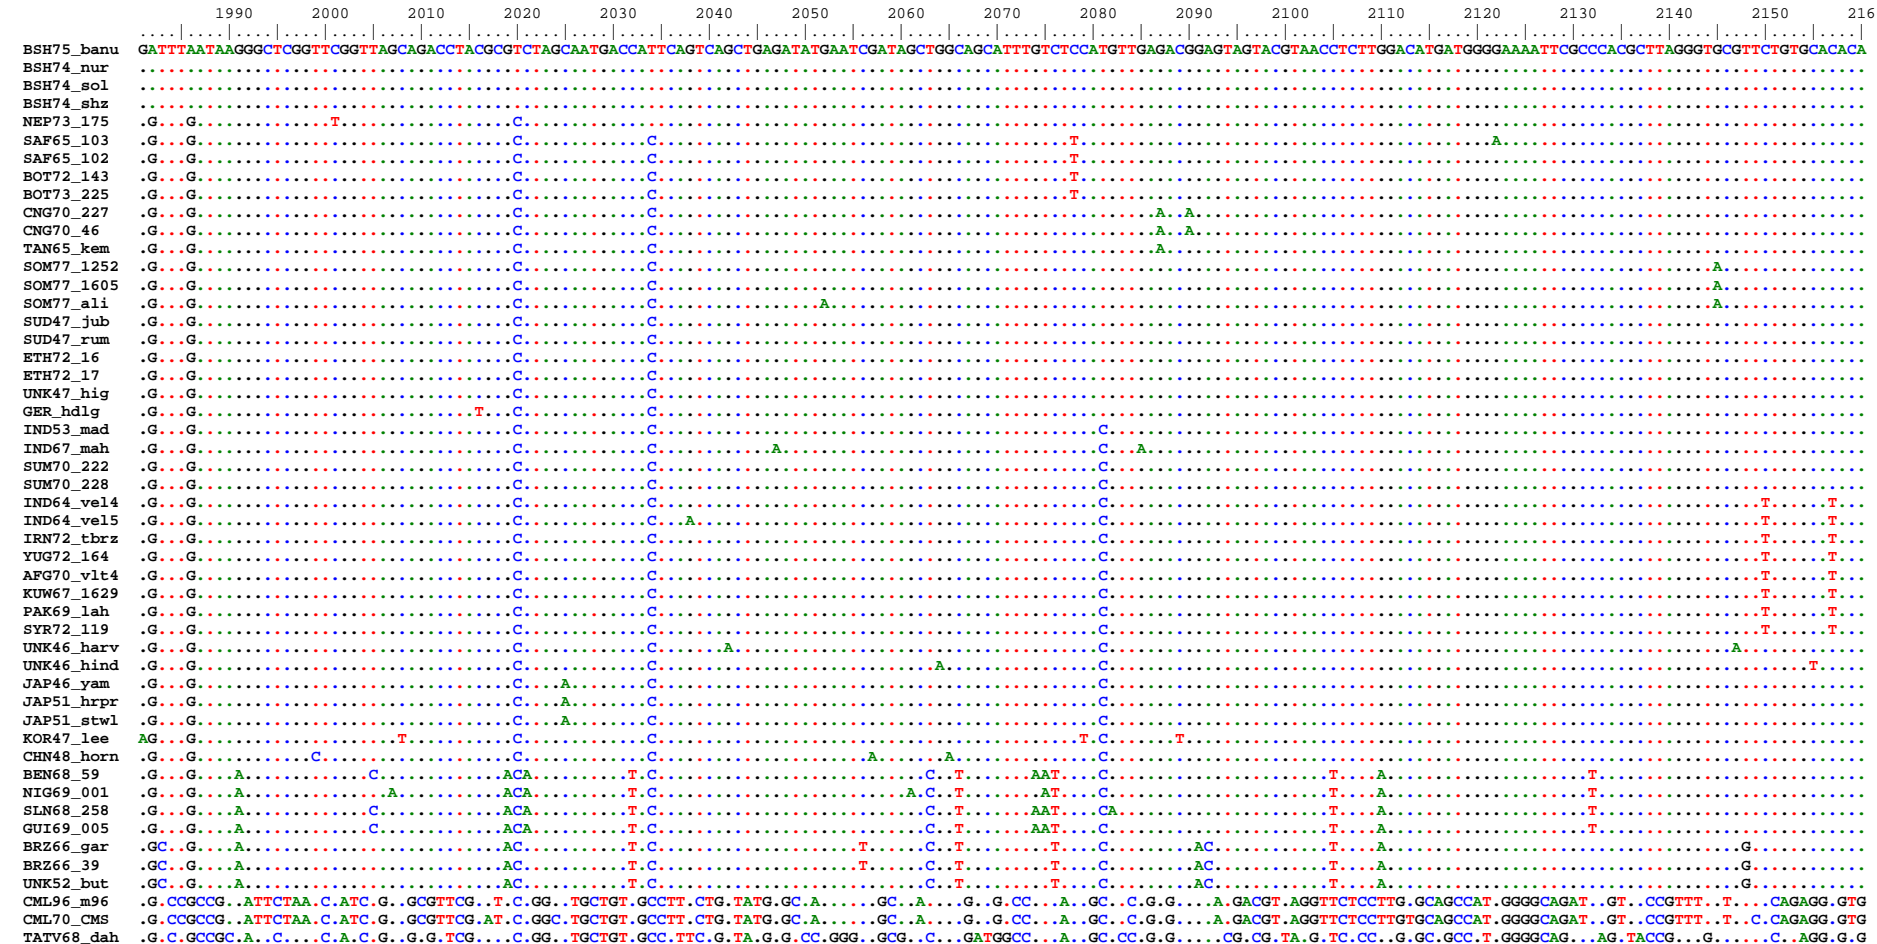

2170 2180 2190 2200 2210 2220 2230 2240 2250 2260 2270 2280 2290 2300 2310 2320 2330 2340  
 BSH75\_banu A A A G T A C C A A C A A A T C C G A G T T C A T A G G G A G T G G A T A C C A C A T T C C C C A C T G C G T G C G G T T T C G G G G C G T C A G G A T A A G C C C C C C G T G G T A C T A A A G A T G C C G G G C T T A T G A C G A G T A A C G C G A C T A A A G T A G A A T G T C C C G C G G T T A T C C C G T C G G T C T C G A G A G C T T G C G G A A G  
 BSH74\_nur .....  
 BSH74\_sol .....  
 BSH74\_shz .....  
 NEP73\_175 ..... C .....  
 SAF65\_103 ..... C ..... G ..... A ..... C .....  
 SAF65\_102 ..... C ..... G ..... A ..... C .....  
 BOT72\_143 ..... C ..... G ..... T ..... A ..... C .....  
 BOT73\_225 ..... C ..... G ..... T ..... A ..... C .....  
 CNG70\_227 ..... C ..... G ..... T ..... A ..... T A ..... C ..... A .....  
 CNG70\_46 ..... C ..... T A ..... T A ..... C ..... A .....  
 TAN65\_kem ..... C ..... A ..... C ..... A .....  
 SOM77\_1252 ..... C ..... A ..... C .....  
 SOM77\_1605 ..... C ..... A ..... C .....  
 SOM77\_ali ..... C ..... A ..... C .....  
 SUD47\_jub ..... C ..... C ..... C .....  
 SUD47\_rum ..... C ..... C ..... C .....  
 ETH72\_16 ..... C ..... T ..... T ..... C .....  
 ETH72\_17 ..... C ..... T ..... T ..... C .....  
 UNK47\_hig ..... C ..... C ..... C .....  
 GER\_hdlg ..... C ..... C ..... C .....  
 IND53\_mad ..... T C ..... A ..... A ..... C .....  
 IND67\_mah ..... C ..... C ..... A ..... C .....  
 SUM70\_222 ..... T C ..... A ..... A ..... C .....  
 SUM70\_228 ..... C ..... A ..... C .....  
 IND64\_ve14 ..... C ..... A ..... C .....  
 IND64\_ve15 ..... C ..... A ..... C .....  
 IRN72\_tbrz ..... C ..... A ..... C .....  
 YUG72\_164 ..... C ..... A ..... C .....  
 AFG70\_v1t4 ..... C ..... A ..... C .....  
 KUW67\_1629 ..... C ..... A ..... C .....  
 PAK69\_lah ..... C ..... A ..... C .....  
 SYR72\_119 ..... C ..... A ..... C .....  
 UNK46\_harv ..... C ..... G ..... T ..... C .....  
 UNK46\_hind ..... C ..... C ..... C ..... A .....  
 JAP46\_yam ..... C ..... C ..... C .....  
 JAP51\_hrpr ..... C ..... T ..... C .....  
 JAP51\_stw1 ..... C ..... TC ..... C .....  
 KOR47\_lee ..... C ..... A ..... T ..... C ..... T .....  
 CHN48\_horn ..... C ..... A ..... AA ..... G ..... T ..... C ..... A .....  
 BEN68\_59 T ..... T C ..... A ..... G ..... A ..... T GT ..... GGA ..... C ..... A A ..... T .....  
 NIG69\_001 T ..... T C ..... G ..... A ..... T GT ..... GGA ..... C ..... A A .....  
 SLN68\_258 T ..... T C ..... A ..... G ..... A ..... T GT ..... GGA ..... C ..... A A ..... T .....  
 GUI69\_005 T ..... T C ..... A ..... G ..... A ..... T GT ..... GGA ..... C ..... A A ..... T .....  
 BRZ66\_gar T ..... T C A ..... A ..... T ..... G ..... G ..... C ..... A A ..... T A .....  
 BRZ66\_39 T ..... T C A ..... A ..... T ..... G ..... GT ..... GG ..... C ..... A T A .....  
 UNK52\_but T ..... T C A ..... A ..... T ..... G ..... GT ..... GG ..... C ..... A T A .....  
 CML96\_m96 TCACT TC T GCC CG ..... CG ..... AC ACCG TG CCGA ..... GTC A C TA CCC T TA ACTGAAGC GAT TA TT C CGA TG CA TA ..... ACG ..... G CT T AG CG T G GGG CT TAG TTCAGCTGT CT CTC AG GTTCG ..... CTA  
 CML70\_CMS TCACT TC T GCC CG ..... CG ..... AC ACCG TG CCGA ..... GTC A C TA CCC T TA ACTGAAGC GAT TA TT C CGA TG CA TA ..... ACG ..... G CT T AG CG T G GGG CT TA TTCAGCTGT CT CTC AG GTTCG ..... CTA  
 TATV68\_dah ..... CA G C ..... GGCT ..... CGA A ACT ..... CGA GAC G A A G C ..... CT ..... CCC T ..... GA G ..... G GC G AT ..... TC ..... GA TGTG A T A A ..... CG CAATTC ..... T G GT ..... G GGG A T T ..... CAG ..... T C C G G TC T CGA

2350 2360 2370 2380 2390 2400 2410 2420 2430

BSH75\_banu CTTACGGGACTCGGCAGAGTCGGTCGTCTCTCCTCGTATGTACCAGGCTCAAATGTGTAGATCAAGGGAAATCGTCGGGAGTATACAACCTAGTCG  
BSH74\_nur .....  
BSH74\_sol .....  
BSH74\_shz .....  
NEP73\_175 .....A.....C  
SAF65\_103 .....A.....  
SAF65\_102 .....A.....  
BOT72\_143 .....A.....  
BOT73\_225 .....A.....  
CNG70\_227 .....A.....T.....C  
CNG70\_46 .....A.....C  
TAN65\_kem .....A.....C  
SOM77\_1252 .....A.....A.....AA  
SOM77\_1605 .....A.....A.....AA  
SOM77\_ali .....A.....A.....AA  
SUD47\_jub .....A.....  
SUD47\_rum .....A.....  
ETH72\_16 .....G.....A.....  
ETH72\_17 .....G.....A.....  
UNK47\_hig .....A.....  
GER\_hdlg .....A.....  
IND53\_mad .....A.....A  
IND67\_mah .....C...G...A.....A.C  
SUM70\_222 .....A.....A  
SUM70\_228 .....A.....A  
IND64\_ve14 .....T.....A.....A  
IND64\_ve15 .....T.....A.....A  
IRN72\_tbrz .....T.....A.....A  
YUG72\_164 .....T.....A.....A  
AFG70\_v1t4 .....T.....A.....A  
KUW67\_1629 .....T.....A.....A  
PAK69\_lah .....T.....A.....A  
SYR72\_119 .....T.....A.....A  
UNK46\_harv .....A.....A.....A  
UNK46\_hind .....A.....A.....A  
JAP46\_yam .....A.....A.....  
JAP51\_hrpr .....A.....A.....  
JAP51\_stw1 .....T...T...A.....A  
KOR47\_lee .....A.....A.....  
CHN48\_horn .....A.....A.....  
BEN68\_59 .....A.....CA...G.....A.C...T...A.G.T.A.....C...A.A  
NIG69\_001 .....A.....C...G.....A.C...T...A.G.T.A.....C...A.A  
SLN68\_258 .....A.....CA...G.....A.C...T...A.G.T.A.....C...A.A  
GUI69\_005 .....A.....CA...G.....A.C...T...A.G.T.A.....C...A.A  
BRZ66\_gar .....A.....C...G.....A.C...T...A.G...A.....C...A.A  
BRZ66\_39 .....A.....C...G.....A.C...T...A.G...A.....C...A.A  
UNK52\_but .....A.....C...G.....A.C...T...A.G...A.....C...A.A  
CML96\_m96 GCCGA..AAG...T.T..CTCT.A..TCTTCC.TCT.CGC.GCT.G..TC.GG.AA..A.AGC.TGAA.GT.CAT.A.AAT...CG.G.TCCA.A  
CML70\_CMS GCCGA..AAG...T.T..CTCT.A..TCTTCC.TCT.CGC.GCT.G..TC.GG.AA..A.AGC.TGAA.GT.CAT.A.AAT...CG.G.TCCA.A  
TATV68\_dah GCCG...G..A..T.T..A.AC..CT.CCT.C..CGC.GC..G..T.TGG.A...G..TG.A.GG.CA..AA..TA..CGTGG..C...
