# Supplementary material
Source: PubMed Central journal article supplement (PMC2000395)
Supplement: pnas_0609268104_8.pdf [file pnas_0609268104_8.pdf]

| <b>VARV isolates compared*</b>                           | <b>Year isolation</b> | <b>SNPs between genomes</b> |
|----------------------------------------------------------|-----------------------|-----------------------------|
| ETH72_16 vs ETH72_17                                     | 1972                  | 0                           |
| AFG70_vlt4 vs SYR72_119 <sup>†</sup>                     | 1970, 1972            | 1                           |
| SYR72_119 vs PAK69_lah <sup>†</sup>                      | 1972, 1969            | 1                           |
| SYR72_119 vs IRN72_tbrz <sup>†</sup>                     | 1972                  | 1                           |
| BSH74_nur, BSH74_shz, BSH74_sol, BSH75_banu <sup>‡</sup> | 1974, 1975            | 0                           |

\* All isolates sequence from references 1.

<sup>†</sup> These isolates are epidemiologically linked. See reference 2.

<sup>‡</sup> BSH 75\_banu contains 4 indels compared other three Bangladesh isolates of 1974.

1. Esposito JJ, Sammons SA, Frace AM, Osborne JD, Olsen-Rasmussen M, Zhang M, Govil D, Damon IK, Kline R, Laker M et al. (2006) Science 313, 807-812.

2. Fenner F, Henderson DA, Arita I, Jezek Z & Ladnyi ID. (1988) in Smallpox and Its Eradication, ed. Frank Fenner (World Health Organization, Geneva).
