# Supplementary material
Source: PubMed Central journal article supplement (PMC2000395)
Supplement: pnas_0609268104_9.pdf [file pnas_0609268104_9.pdf]

| Data set <sup>*</sup> | Parameters  |                             | Calibration Node [95%HPD] <sup>†</sup> |                    |                  |                |
|-----------------------|-------------|-----------------------------|----------------------------------------|--------------------|------------------|----------------|
|                       | Clock model | Calibration                 | VARV P-I radiation                     | Alastrim/W. Africa | VARV P-I/P-II    | VARV/TATV-CMLV |
| I. VARV               | strict      | isolation date <sup>‡</sup> | 60 [54,66]                             | 109 [91,127]       | 217 [183,253]    | –              |
| II. VARV              | strict      | African clade <sup>§</sup>  | 421 [371,476]                          | 1093 [920,1281]    | 2263 [1937,2582] | –              |

<sup>\*</sup> VARV cSNPs matrix include 1347 SNPs sites.

<sup>†</sup>The mean and 95% HPD (highest posterior density) intervals (in years) of the posterior probability distribution for the nodes ( $t_{MRCA}$ ).

<sup>‡</sup>The isolation date of each isolate was used as the date in the BEAST calculation.

<sup>§</sup>The calculation was calibrated by setting prior of African VARV clade (exclude West Africa) at 250 years (South Africa smallpox historic records).
