# Supplementary material
Source: PubMed Central journal article supplement (PMC2000395)
Supplement: pnas_0609268104_10.pdf [file pnas_0609268104_10.pdf]

A \*. The number of SNPs / transversion (tv) SNPs for VARV-TATV-CMLV cSNPs of selected isolates (representative of each sub-clades).

|               | 1          | 2          | 3          | 4          | 5          | 6          | 7          | 8          | 9          | 10         | 11         | 12         | 13         | 14         | 15        | 16 |
|---------------|------------|------------|------------|------------|------------|------------|------------|------------|------------|------------|------------|------------|------------|------------|-----------|----|
| 1 SFA65_102   | -          |            |            |            |            |            |            |            |            |            |            |            |            |            |           |    |
| 2 SOM77_ali   | 54 / 2     | -          |            |            |            |            |            |            |            |            |            |            |            |            |           |    |
| 3 SUD47_jub   | 23 / 3     | 41 / 3     | -          |            |            |            |            |            |            |            |            |            |            |            |           |    |
| 4 CNG70_46    | 36 / 2     | 60 / 2     | 29 / 3     | -          |            |            |            |            |            |            |            |            |            |            |           |    |
| 5 ETH72_16    | 43 / 2     | 43 / 2     | 30 / 3     | 49 / 2     | -          |            |            |            |            |            |            |            |            |            |           |    |
| 6 BSH75_banu  | 52 / 4     | 76 / 4     | 45 / 5     | 58 / 4     | 65 / 4     | -          |            |            |            |            |            |            |            |            |           |    |
| 7 IND53_mad   | 40 / 4     | 64 / 4     | 33 / 5     | 46 / 4     | 53 / 4     | 42 / 6     | -          |            |            |            |            |            |            |            |           |    |
| 8 SUM72_222   | 56 / 6     | 78 / 6     | 49 / 7     | 62 / 6     | 69 / 6     | 58 / 8     | 38 / 4     | -          |            |            |            |            |            |            |           |    |
| 9 IRN72_tbrz  | 60 / 5     | 82 / 5     | 53 / 6     | 66 / 5     | 73 / 5     | 62 / 7     | 42 / 3     | 52 / 3     | -          |            |            |            |            |            |           |    |
| 10 JAP46_yam  | 60 / 6     | 84 / 6     | 53 / 7     | 64 / 6     | 73 / 6     | 62 / 8     | 42 / 4     | 52 / 4     | 56 / 3     | -          |            |            |            |            |           |    |
| 11 CHN48_horn | 67 / 8     | 91 / 8     | 60 / 9     | 73 / 8     | 80 / 8     | 69 / 10    | 49 / 6     | 59 / 6     | 63 / 5     | 49 / 6     | -          |            |            |            |           |    |
| 12 BEN68_59   | 255 / 31   | 279 / 31   | 248 / 32   | 261 / 31   | 268 / 31   | 255 / 33   | 237 / 29   | 245 / 29   | 251 / 28   | 237 / 29   | 242 / 31   | -          |            |            |           |    |
| 13 NIG69_001  | 259 / 28   | 281 / 28   | 252 / 29   | 265 / 28   | 272 / 28   | 259 / 30   | 241 / 26   | 247 / 26   | 255 / 25   | 241 / 26   | 246 / 28   | 42 / 3     | -          |            |           |    |
| 14 BRZ66_39   | 257 / 31   | 281 / 31   | 250 / 32   | 263 / 31   | 270 / 31   | 257 / 33   | 239 / 29   | 247 / 29   | 253 / 28   | 239 / 29   | 244 / 31   | 140 / 22   | 142 / 19   | -          |           |    |
| 15 CML70_cms  | 1548 / 348 | 1566 / 348 | 1539 / 249 | 1549 / 348 | 1557 / 348 | 1546 / 350 | 1528 / 346 | 1533 / 346 | 1542 / 345 | 1524 / 346 | 1532 / 346 | 1554 / 355 | 1560 / 352 | 1556 / 355 | -         |    |
| 16 TAT68_dah  | 1286 / 243 | 1309 / 243 | 1279 / 244 | 1291 / 243 | 1297 / 243 | 1286 / 245 | 1268 / 241 | 1275 / 241 | 1282 / 240 | 1266 / 241 | 1275 / 243 | 1299 / 248 | 1301 / 245 | 1296 / 248 | 840 / 317 | -  |

\*The numbers of SNPs / tv SNPs were generated from VARV-TATV-CMLV cSNPs (SIFig. 9) using PAUP program(8).

B†. The number of SNPs / transversion (tv) SNPs for VARV cSNPs of selected isolates (representative of each sub-clades).

|               | 1        | 2        | 3        | 4        | 5        | 6        | 7        | 8        | 9        | 10       | 11       | 12       | 13       | 14       | 15       | 16       | 17     | 18 |
|---------------|----------|----------|----------|----------|----------|----------|----------|----------|----------|----------|----------|----------|----------|----------|----------|----------|--------|----|
| 1 BOT72_143   | -        |          |          |          |          |          |          |          |          |          |          |          |          |          |          |          |        |    |
| 2 SFA65_102   | 23 / 3   | -        |          |          |          |          |          |          |          |          |          |          |          |          |          |          |        |    |
| 3 SOM77_ali   | 112 / 12 | 99 / 9   | -        |          |          |          |          |          |          |          |          |          |          |          |          |          |        |    |
| 4 TAN65_kem   | 75 / 8   | 60 / 5   | 105 / 10 | -        |          |          |          |          |          |          |          |          |          |          |          |          |        |    |
| 5 SUD47_jub   | 54 / 8   | 39 / 5   | 74 / 8   | 47 / 6   | -        |          |          |          |          |          |          |          |          |          |          |          |        |    |
| 6 CNG70_46    | 89 / 7   | 74 / 4   | 117 / 9  | 30 / 1   | 61 / 5   | -        |          |          |          |          |          |          |          |          |          |          |        |    |
| 7 ETH72_16    | 85 / 10  | 72 / 7   | 79 / 8   | 78 / 8   | 47 / 6   | 92 / 7   | -        |          |          |          |          |          |          |          |          |          |        |    |
| 8 BSH75_banu  | 103 / 12 | 88 / 9   | 135 / 14 | 96 / 10  | 75 / 10  | 108 / 9  | 108 / 12 | -        |          |          |          |          |          |          |          |          |        |    |
| 9 IND53_mad   | 75 / 10  | 60 / 7   | 107 / 12 | 68 / 8   | 47 / 8   | 80 / 7   | 80 / 10  | 70 / 10  | -        |          |          |          |          |          |          |          |        |    |
| 10 SUM72_222  | 113 / 12 | 98 / 9   | 143 / 14 | 106 / 10 | 85 / 10  | 118 / 9  | 118 / 12 | 108 / 12 | 68 / 6   | -        |          |          |          |          |          |          |        |    |
| 11 KUW67_1629 | 114 / 13 | 99 / 10  | 144 / 15 | 107 / 11 | 85 / 11  | 117 / 10 | 119 / 13 | 109 / 13 | 71 / 7   | 99 / 7   | -        |          |          |          |          |          |        |    |
| 12 JAP46_yam  | 118 / 13 | 103 / 10 | 150 / 15 | 111 / 11 | 90 / 11  | 121 / 10 | 123 / 13 | 113 / 13 | 75 / 7   | 103 / 7  | 102 / 8  | -        |          |          |          |          |        |    |
| 13 KOR47_lee  | 112 / 15 | 107 / 12 | 154 / 17 | 113 / 13 | 94 / 13  | 125 / 12 | 127 / 15 | 117 / 15 | 79 / 9   | 107 / 9  | 106 / 10 | 78 / 8   | -        |          |          |          |        |    |
| 14 CHN48_horn | 132 / 21 | 117 / 18 | 164 / 23 | 125 / 19 | 104 / 19 | 137 / 18 | 137 / 21 | 127 / 21 | 89 / 15  | 117 / 15 | 116 / 16 | 90 / 14  | 94 / 16  | -        |          |          |        |    |
| 15 SLN68_258  | 460 / 66 | 447 / 63 | 490 / 68 | 455 / 64 | 434 / 64 | 467 / 63 | 465 / 66 | 457 / 66 | 421 / 60 | 449 / 60 | 448 / 61 | 418 / 59 | 423 / 61 | 434 / 67 | -        |          |        |    |
| 16 NIG69_001  | 466 / 63 | 453 / 60 | 496 / 65 | 461 / 61 | 440 / 61 | 473 / 60 | 471 / 63 | 463 / 63 | 427 / 57 | 453 / 57 | 452 / 58 | 426 / 56 | 433 / 58 | 442 / 64 | 78 / 9   | -        |        |    |
| 17 UNK52_but  | 445 / 63 | 432 / 60 | 479 / 65 | 440 / 61 | 419 / 61 | 452 / 60 | 450 / 63 | 442 / 63 | 406 / 57 | 432 / 57 | 433 / 58 | 403 / 56 | 408 / 58 | 419 / 64 | 231 / 37 | 241 / 34 | -      |    |
| 18 BRZ66_39   | 462 / 64 | 449 / 61 | 496 / 66 | 457 / 62 | 436 / 62 | 469 / 61 | 467 / 64 | 459 / 64 | 423 / 58 | 449 / 58 | 450 / 59 | 420 / 57 | 423 / 59 | 436 / 65 | 246 / 38 | 256 / 35 | 25 / 1 | -  |

†The number of SNPs / tv SNPs were generated from VARV cSNPs (SI Fig. 8) using PAUP program.
