# Supplementary material
Source: PubMed Central journal article supplement (PMC2000395)

**A**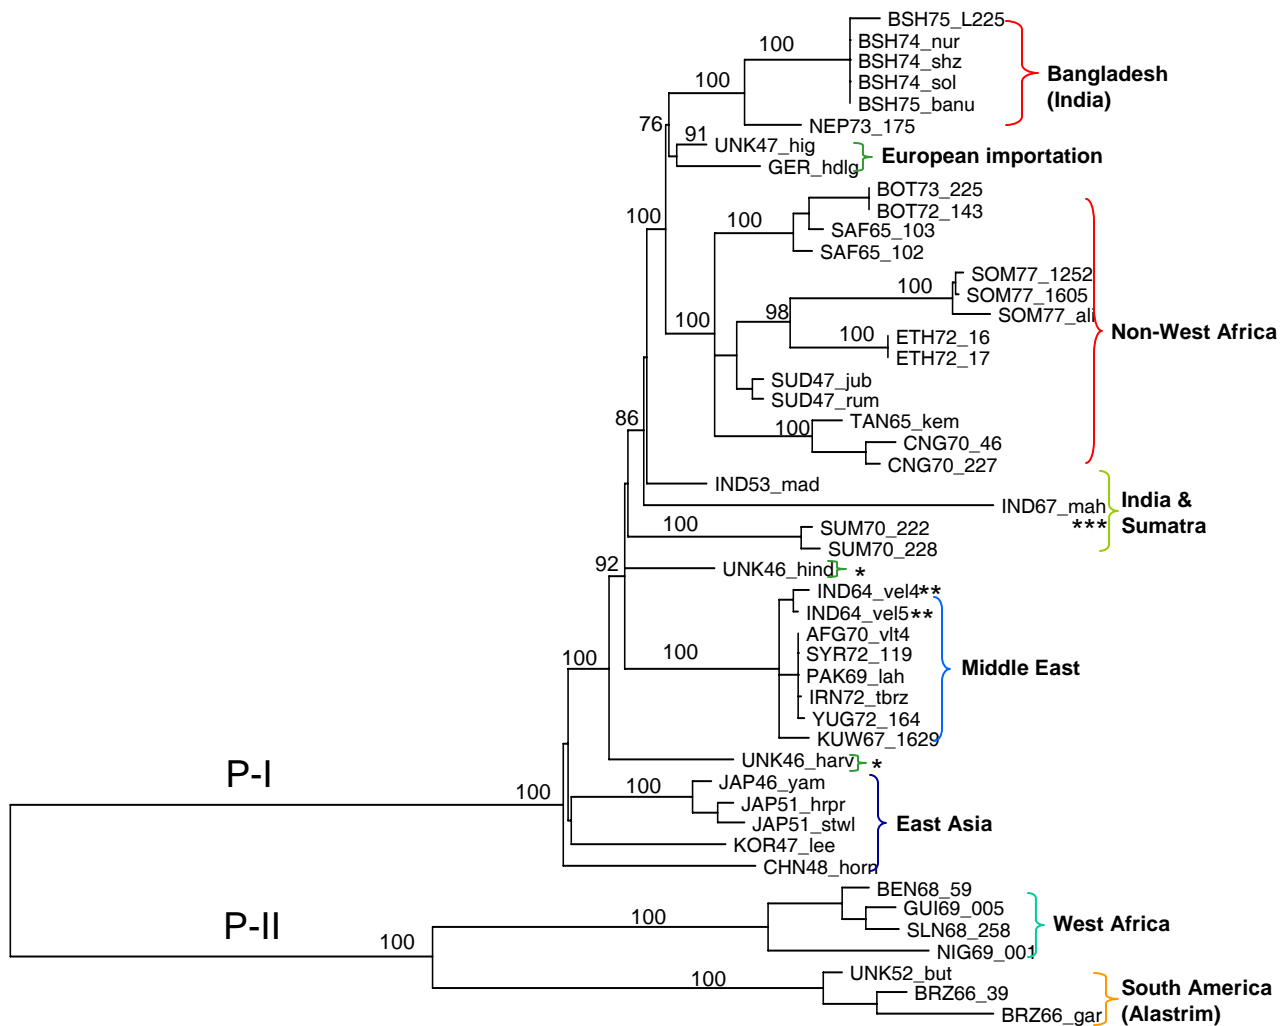

— 10 changes

\*, \*\*: importation cases (Fig. 1)

\*\*\*: see supplemental Note 4

**B**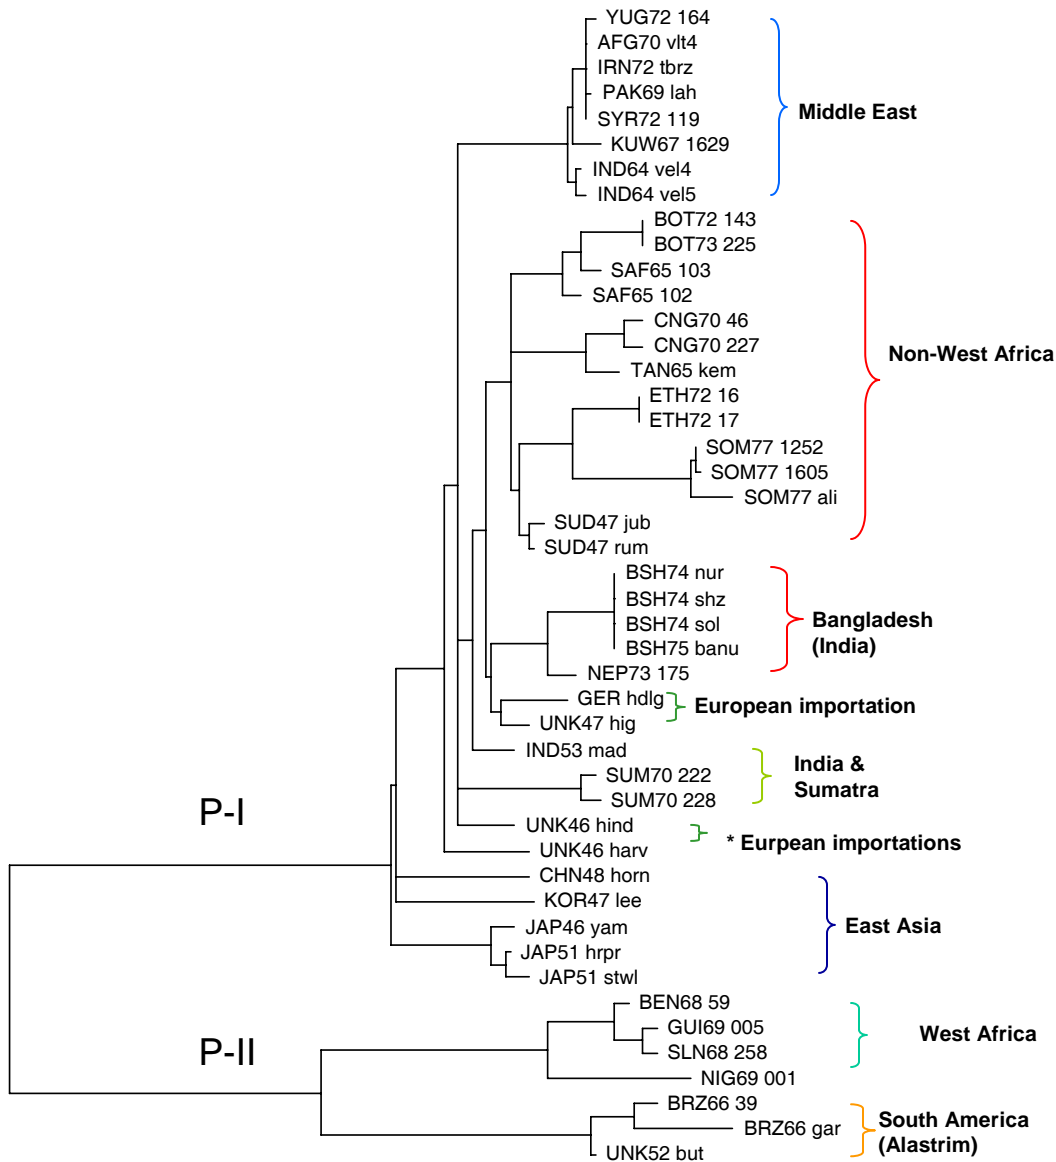

— 5 changes

C

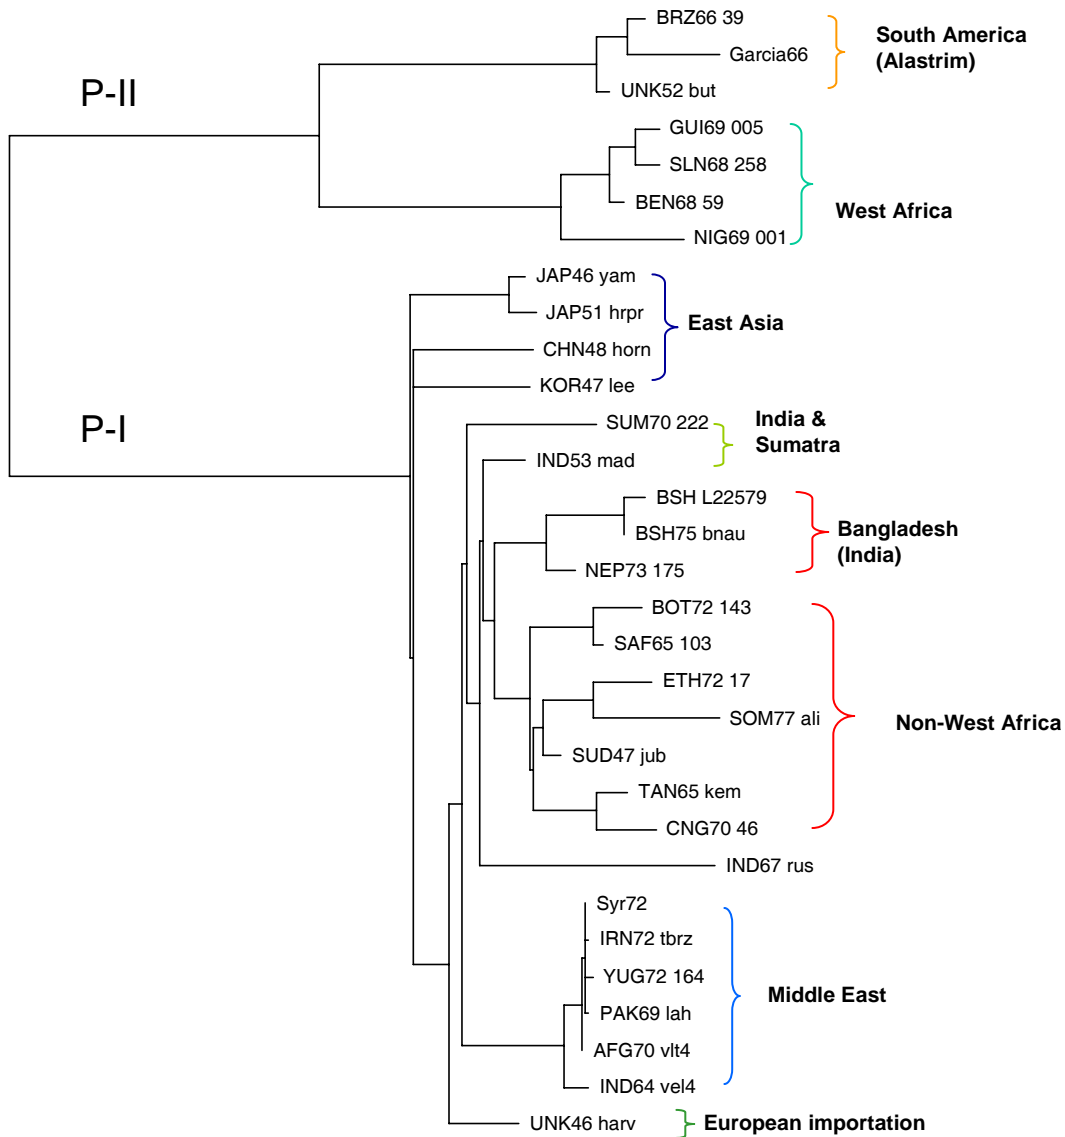

Supplement: pnas_0609268104_1.pdf [file pnas_0609268104_1.pdf]
